# Supplementary material for: COVID-19 related stigma and health-protective behaviours among adolescents in the Netherlands: An explorative study
Source: PLoS One. 2021 Jun 22;16(6):e0253342. doi: 10.1371/journal.pone.0253342 (PMC8219143; doi:10.1371/journal.pone.0253342)
Supplement: S1 Appendix — (XLSX) [file pone.0253342.s001.xlsx]

## Sheet: Bescherming motivatie COVID-19
Progress	UserLanguage	GSLCHT	LFTD	SCHL	GRP	NV	CHTRGRND	VRSKNNR	K1	K2	K3	E1_1	E1_2	E1_3	E1_4	E1_5	E2	E3	ER1_1	ER1_2	ER1_3	ER1_4	ER1_5	R1_1	R1_2	R1_3	R2_1	R2_2	R2_3	R2_4	R2_5	R2_6	Z1_1	Z1_2	Z1_3	Z2_1	Z2_2	Z2_3	Z2_4	Z2_5	Z2_6	I1_1	I1_2	I1_3	I1_4	I1_5	I1_6	I1_7	I2_1
100	NL	2	12	10	3	3	1	2	1	1	1	4	2	3	5	4	3	3	1	4	3	1	3	2	2	3	4	4	5	2	1	4	3	3	2	4	3	4	2	2	5	1	4	4	1	4	2	2	3
100	NL	1	14	3	5	3	1	2	1	1	1	4	3	4	5	4	4	2	3	4	4	1	3	4	4	4	5	5	5	1	5	5	3	3	3	5	4	5	3	5	5	4	4	5	3	5	3	1	4
100	NL	2	13	3	4	2	1	2	1	1	1	3	3	4	5	4	3	3	3	4	3	1	1	3	1	2	5	5	5	3	5	5	3	2	3	5	5	5	3	5	5	3	3	4	2	4	4	2	4
100	NL	2	15	7	5	3	1	2	1	1	1	4	1	4	5	3	3	2	1	4	4	1	3	3	4	2	4	5	5	2	2	3	2	3	2	4	4	5	3	3	3	3	3	2	2	4	3	2	4
100	NL	2	12	7	3	6	1	2	1	1	1	4	2	4	5	4	2	2	2	5	4	2	2	3	4	2	5	5	5	2	5	4	1	4	2	5	5	5	3	5	5	1	4	4	4	4	4	4	5
100	NL	2	12	8	3	6	1	2	1	2	1	4	1	5	5	4	5	4	1	5	4	1	4	2	2	1	4	5	5	5	2	5	1	3	1	5	5	5	4	4	5	5	5	5	1	4	4	4	5
100	NL	2	14	11	5	3	1	2	1	1	1	3	1	4	5	4	3	2	1	4	4	1	4	3	4	3	5	4	5	2	2	5	3	3	3	4	4	5	3	3	5	5	5	4	1	4	4	4	5
100	NL	1	14	11	5	3	2	1	1	1	1	4	1	3	5	4	2	2	1	5	4	1	2	2	4	1	5	4	5	2	3	4	2	2	1	4	4	4	1	2	3	3	4	2	1	5	2	3	3
100	NL	2	13	3	3	3	1	2	1	1	1	3	1	4	5	4	3	3	3	5	4	1	2	3	2	1	5	5	5	1	3	4	2	2	1	5	5	5	1	3	4	4	3	5	2	4	3	2	5
100	NL	1	13	10	4	6	1	2	1	1	1	5	3	5	5	5	3	2	1	4	2	1	2	4	4	2	5	5	5	4	1	5	3	4	3	5	5	5	2	2	5	5	4	1	1	4	1	3	4
100	NL	2	15	11	4	8	1	2	1	1	1	4	2	4	5	3	4	3	3	4	4	2	4	3	3	2	4	4	5	3	4	5	2	3	2	5	5	5	3	4	5	5	4	4	1	3	1	2	4
100	NL	2	11	11	3	6	1	2	1	1	1	3	1	4	5	3	3	1	2	3	4	2	2	2	3	2	4	4	3	2	2	4	2	2	2	4	3	3	2	2	5	4	3	1	1	4	3	3	4
100	NL	1	15	3	5	3	1	2	1	1	1	5	1	5	5	4	3	3	1	2	4	1	1	2	3	2	4	4	5	2	3	5	2	3	2	4	5	5	3	5	5	4	3	3	1	2	2	1	4
100	NL	2	12	7	3	6	1	1	1	1	1	4	1	3	5	4	2	2	3	5	4	2	3	3	3	1	4	4	5	2	3	4	1	2	1	4	4	5	3	3	4	3	3	4	2	5	4	1	4
100	NL	2	13	3	3	2	2	2	1	1	1	3	2	5	5	5	3	3	3	3	3	3	1	3	4	2	5	5	5	4	5	5	2	2	2	5	5	5	4	5	5	3	3	3	1	3	2	4	3
100	NL	2	14	3	5	3	1	2	1	1	1	4	3	5	5	5	3	2	2	3	3	2	2	4	4	4	4	5	5	3	3	4	2	3	2	5	5	5	3	3	4	4	3	4	3	3	2	2	4
100	NL	2	11	2	2	4	1	1	1	1	1	3	2	4	5	5	3	3	2	4	3	3	3	2	4	2	5	4	5	2	3	4	2	3	2	4	3	5	2	4	5	4	4	2	4	3	3	3	3
100	NL	2	13	8	4	6	2	2	1	1	1	4	1	2	5	5	2	1	1	3	3	2	3	4	3	2	5	5	5	2	5	5	2	1	2	5	5	5	2	4	5	4	2	1	2	5	3	2	5
100	NL	1	13	3	5	3	1	2	1	1	2	3	2	4	5	4	4	4	2	4	3	2	2	3	3	2	4	4	4	2	3	4	3	2	2	5	4	4	3	4	4	4	2	1	2	4	3	3	4
100	NL	1	14	11	5	6	1	2	1	1	1	3	2	2	5	4	1	1	2	3	4	1	2	4	4	3	5	5	5	2	5	5	3	3	2	5	3	5	4	3	5	1	4	4	1	3	3	3	3
100	NL	2	13	7	3	2	1	2	1	1	1	5	2	5	5	4	5	4	1	5	4	1	2	3	4	3	5	4	5	1	2	4	2	4	1	5	4	5	1	2	5	5	1	1	1	4	1	1	5
100	NL	1	12	3	3	2	1	2	1	1	1	3	1	5	4	2	4	3	2	5	3	1	4	2	4	2	4	5	5	1	4	4	3	4	3	4	5	5	1	4	4	4	2	2	2	5	3	1	5
100	NL	2	13	7	4	6	1	2	1	2	1	4	2	5	5	3	4	3	1	4	4	1	3	3	4	2	5	5	5	2	4	5	2	4	2	5	5	5	5	5	5	5	2	5	2	5	3	3	4
100	NL	2	13	7	4	6	1	2	1	1	1	3	3	4	5	5	4	2	2	5	4	3	4	2	2	2	5	5	5	1	5	5	2	2	2	5	5	5	1	5	5	2	3	4	1	5	2	1	4
100	NL	2	13	8	4	6	2	2	1	1	1	4	2	4	5	5	2	2	2	4	3	1	3	3	3	1	4	4	5	3	5	3	3	3	2	4	4	5	3	5	3	2	4	4	1	2	4	1	3
100	NL	2	14	7	4	8	1	2	1	1	1	3	3	5	5	4	3	3	2	4	4	1	2	4	4	3	5	5	5	3	3	4	3	3	2	5	5	5	4	4	5	5	5	3	3	4	2	2	4
100	NL	2	12	7	3	6	1	2	1	1	1	4	2	4	5	4	3	3	3	4	4	1	3	3	4	2	5	5	5	2	3	5	2	3	3	4	5	5	3	4	5	5	3	2	3	5	3	1	5
100	NL	2	15	3	5	3	1	2	1	1	1	4	1	3	5	3	3	2	2	3	2	1	2	2	3	2	4	4	5	2	2	4	3	3	2	3	4	5	2	2	3	4	5	5	3	4	3	2	4
100	NL	1	13	11	4	6	1	1	1	1	1	4	2	4	5	5	2	1	1	4	3	1	1	2	4	3	5	5	5	3	4	5	3	4	2	5	5	5	3	3	5	3	1	3	1	2	2	1	4
100	NL	2	14	11	4	2	1	2	1	1	1	3	2	5	5	5	4	3	1	3	1	1	1	3	4	3	4	5	5	4	4	5	3	4	2	4	5	5	3	4	5	2	3	4	1	3	3	4	4
100	NL	1	15	11	5	1	1	2	1	2	1	1	1	3	5	4	2	1	1	1	1	1	1	3	3	2	4	4	5	4	4	4	2	2	2	5	5	5	5	5	5	4	4	5	2	3	3	2	4
100	NL	1	12	3	3	3	1	2	1	1	1	4	2	2	5	4	2	1	1	4	4	1	2	4	4	4	5	5	5	1	3	4	3	3	2	5	5	5	2	2	2	4	5	2	1	4	2	3	5
100	NL	2	14	3	4	3	1	2	1	1	1	5	3	5	5	3	4	4	1	4	2	2	4	3	4	2	4	4	5	2	3	4	3	3	2	4	4	5	3	3	4	4	1	3	1	5	4	3	4
100	NL	2	13	3	4	3	2	1	1	1	1	4	3	4	5	4	3	3	3	5	2	2	3	2	3	2	4	4	5	2	3	4	2	3	2	4	3	5	2	2	5	1	2	5	1	4	4	4	4
100	NL	2	13	11	4	6	1	2	1	1	1	3	2	2	5	4	3	3	2	5	5	2	2	3	3	1	4	4	5	1	1	5	2	2	1	4	4	4	1	1	5	1	3	4	1	5	3	3	3
100	NL	1	15	3	4	3	2	2	1	2	1	5	5	5	5	5	4	2	1	1	5	3	2	4	3	4	5	5	5	5	5	5	2	2	3	5	5	5	5	5	5	3	5	5	2	4	4	1	5
100	NL	2	11	2	2	4	2	1	1	2	1	4	2	4	5	5	3	3	2	5	3	2	1	3	2	2	4	4	5	1	3	1	2	3	2	4	4	5	2	4	4	5	1	1	1	4	2	2	4
100	NL	2	13	3	3	3	1	1	1	1	1	4	1	3	5	4	3	3	2	5	4	1	3	2	2	2	4	2	5	1	2	2	1	2	2	3	2	5	1	2	3	5	1	4	1	5	3	3	4
100	NL	2	14	3	4	3	2	2	1	1	1	5	1	3	5	4	2	2	3	4	4	1	2	4	4	4	5	5	5	1	3	4	2	3	2	5	5	5	1	3	4	3	2	1	2	2	1	2	4
100	NL	1	14	3	4	3	2	1	1	1	1	4	1	2	5	3	2	1	1	4	5	1	2	3	3	2	5	4	4	1	3	4	2	2	3	5	5	5	1	2	5	3	4	4	1	4	3	2	5
100	NL	2	14	3	4	3	2	2	1	1	1	4	3	3	5	4	4	3	2	4	3	1	1	3	4	2	4	5	5	2	3	3	3	3	2	4	5	3	2	3	4	4	3	2	1	4	4	2	4
100	NL	2	13	11	4	6	2	2	1	1	1	4	4	5	5	5	3	3	1	5	3	1	1	4	4	4	5	5	5	5	5	1	4	4	4	5	5	5	5	5	5	5	5	5	5	5	5	5	5
100	NL	1	12	3	3	3	1	2	1	1	2	5	1	3	5	5	4	2	1	4	2	1	2	3	3	1	5	4	5	1	2	5	2	3	1	4	3	5	1	5	5	4	3	4	1	4	4	1	5
100	NL	2	12	3	3	3	2	2	1	1	1	4	1	5	5	5	5	3	3	5	2	1	3	2	4	2	5	4	5	3	3	5	2	4	1	5	5	5	5	3	5	4	1	1	2	5	2	2	4
100	NL	2	11	7	3	6	1	2	1	1	1	3	2	4	5	4	3	2	1	5	3	2	3	2	3	1	4	5	5	2	3	4	2	4	2	5	4	5	4	5	5	4	3	4	1	5	3	3	5
100	NL	1	15	7	5	3	1	2	1	1	1	5	2	4	5	4	4	4	2	5	4	1	3	2	4	3	5	5	5	2	4	5	1	4	2	5	5	5	3	4	5	5	2	1	3	5	3	4	5
100	NL	1	13	7	4	2	1	2	1	1	1	4	2	5	5	2	4	3	2	2	3	2	3	2	4	2	5	4	5	2	5	4	2	3	1	5	4	5	3	5	5	2	2	4	1	3	4	5	3
100	NL	2	15	11	4	6	2	2	1	1	1	3	2	4	5	3	4	3	1	5	4	1	3	3	4	3	5	5	5	4	4	5	3	2	2	4	5	5	3	3	5	4	3	3	1	2	2	2	4
100	NL	2	13	7	4	8	2	2	1	1	1	3	2	4	5	4	3	3	2	4	5	1	2	2	2	3	5	4	5	4	4	5	3	3	1	5	4	5	4	4	5	4	3	2	1	5	2	4	4
100	NL	2	13	10	3	6	2	2	1	1	1	3	1	5	5	4	1	1	1	4	2	1	1	3	4	2	5	5	5	2	3	4	3	4	3	4	5	5	1	2	5	5	5	5	1	4	1	2	4
100	NL	2	13	11	5	3	1	2	1	2	1	4	1	5	5	4	3	3	1	4	3	1	2	2	4	2	5	5	5	2	4	5	3	2	2	5	5	5	2	3	5	3	3	4	1	5	3	3	4
100	NL	2	12	3	3	3	1	2	1	1	1	4	2	3	5	4	3	3	2	5	4	1	3	3	4	2	4	5	4	1	3	4	3	3	2	5	5	5	2	3	4	4	5	4	1	5	4	2	5
100	NL	2	14	7	4	6	1	2	1	1	1	5	1	4	5	4	3	3	3	5	3	2	2	3	3	3	5	5	5	4	4	5	2	3	2	5	5	5	4	4	5	3	3	3	3	4	4	3	3
100	NL	1	14	3	3	3	2	2	1	1	1	4	2	4	5	5	4	4	1	4	4	2	2	2	4	2	5	5	5	1	5	5	2	3	2	5	5	5	3	5	5	1	4	1	1	2	1	1	4
100	NL	1	12	10	3	2	2	2	1	2	1	5	2	5	5	5	2	2	2	3	2	1	1	2	4	1	4	5	5	3	4	2	2	4	1	5	5	5	3	5	2	5	2	1	1	2	1	1	5
100	NL	1	11	2	1	4	2	1	1	1	1	4	3	5	5	3	4	3	1	3	3	1	2	4	4	3	5	5	5	2	2	4	2	4	2	5	5	5	5	5	5	5	3	3	4	5	2	4	4
100	NL	2	15	3	5	3	1	2	1	1	1	4	2	4	5	4	4	3	1	4	4	1	3	2	3	2	5	4	5	2	2	4	2	3	2	4	5	5	3	4	5	4	4	2	4	5	2	3	5
100	NL	2	14	3	5	2	1	2	1	1	1	4	2	4	5	4	4	3	1	4	3	1	2	2	4	3	4	5	4	3	4	4	2	4	3	5	5	5	5	5	5	4	4	5	3	5	4	4	5
100	NL	1	11	2	2	4	1	1	1	1	1	5	5	5	5	5	3	2	1	1	1	1	1	4	4	4	5	5	5	4	4	5	4	3	4	5	5	5	4	4	5	5	4	1	1	5	3	3	4
100	NL	1	14	3	5	3	1	2	1	1	1	4	2	3	5	3	3	2	1	4	5	1	3	4	4	1	5	5	5	2	5	5	2	3	1	4	5	5	4	2	5	4	2	3	1	1	1	1	4
100	NL	2	14	3	5	3	1	2	1	1	1	4	1	4	5	2	3	3	3	5	4	3	3	1	4	1	5	4	5	2	4	3	2	3	2	4	4	4	2	4	4	3	5	4	2	5	4	3	4
100	NL	2	13	3	3	3	1	2	1	1	1	3	1	5	5	5	3	3	2	4	2	3	1	2	4	1	5	5	5	1	4	2	1	3	1	5	5	5	4	5	5	4	4	1	5	4	2	3	4
100	NL	1	13	3	4	3	1	2	1	2	1	4	1	4	5	5	2	2	2	5	4	1	2	2	3	1	5	5	3	3	4	4	2	2	1	5	4	4	3	4	4	5	1	2	2	3	3	2	5
100	NL	2	13	3	3	3	2	2	1	1	1	5	4	5	5	5	5	5	3	5	5	1	3	4	4	2	5	5	5	3	5	5	2	2	2	5	5	5	3	5	5	4	4	4	1	3	4	2	4
100	NL	2	13	8	3	6	2	2	1	1	1	5	3	5	4	4	5	4	2	5	4	1	3	3	4	1	5	5	5	4	5	5	3	4	2	5	5	5	4	5	5	5	5	5	1	5	4	4	5
100	NL	2	16	3	5	2	1	2	1	1	1	5	2	4	4	3	3	2	2	4	4	3	3	3	3	2	4	4	5	1	4	4	2	2	2	4	4	5	1	3	5	4	4	4	1	4	4	2	4
100	NL	1	15	3	5	3	1	2	1	1	1	3	2	4	5	5	2	1	1	4	4	1	2	1	4	1	4	4	5	3	1	4	2	3	2	4	4	5	3	1	5	3	5	5	1	2	2	1	5
100	NL	2	12	2	2	4	1	1	1	2	1	4	3	5	5	4	4	4	1	4	3	2	3	3	4	2	5	5	4	2	4	5	2	3	2	4	5	5	2	3	4	5	4	5	3	5	5	4	5
100	NL	1	13	8	4	3	1	2	1	1	1	4	1	3	5	4	3	3	2	4	3	1	3	3	4	3	5	5	3	2	4	4	2	3	2	5	5	3	1	3	4	2	4	4	1	3	2	3	2
100	NL	2	13	8	4	6	2	2	1	1	1	4	1	5	5	3	3	2	1	5	1	1	1	4	4	2	5	5	5	2	5	5	4	4	2	5	5	5	1	5	5	4	5	5	1	5	3	1	4
100	NL	2	12	3	3	3	1	2	1	2	2	4	2	4	5	4	1	1	3	3	3	3	3	4	4	2	4	5	5	4	2	4	4	4	4	2	3	4	1	2	5	4	2	3	1	3	3	3	3
100	NL	2	14	8	5	3	1	2	1	1	1	3	1	4	5	3	3	3	1	5	4	1	3	2	2	3	5	5	5	1	3	5	1	3	2	5	5	5	4	4	5	2	3	4	1	5	5	3	4
100	NL	2	14	7	5	2	2	2	1	1	1	4	3	4	5	4	3	3	5	3	3	1	3	3	3	3	5	5	5	1	3	4	3	3	3	4	4	4	2	4	4	5	3	1	3	4	2	3	5
100	NL	2	14	11	4	1	1	2	1	1	1	3	3	5	5	4	3	3	3	5	2	3	2	3	3	2	5	5	5	2	3	4	3	4	2	5	5	5	4	4	5	5	5	4	2	3	3	3	4
100	NL	1	13	8	3	6	1	2	1	1	1	4	2	3	5	4	3	2	2	4	3	2	2	2	3	3	5	5	5	2	4	4	3	3	3	5	4	4	3	4	5	4	2	2	1	4	4	4	4
100	NL	1	14	3	5	3	1	2	1	1	1	4	3	4	5	2	3	2	2	4	5	3	2	4	4	4	5	5	5	1	2	4	3	3	2	3	4	5	2	3	4	4	4	4	2	5	5	3	5
100	NL	2	12	11	3	6	1	2	1	1	1	3	2	1	1	1	1	1	2	4	1	2	2	1	1	1	4	3	4	1	1	1	1	1	1	2	4	4	1	2	5	3	1	1	2	1	1	1	3
100	NL	1	13	3	3	3	1	2	1	1	1	5	1	4	5	5	4	3	1	3	2	4	4	4	4	3	5	5	5	1	5	2	1	3	1	5	5	5	1	5	4	5	4	5	1	5	4	1	4
100	NL	2	13	3	4	3	1	2	1	1	1	5	2	3	5	3	2	2	2	5	5	1	2	4	3	3	4	4	5	2	4	4	3	3	2	4	4	5	2	4	5	4	4	3	1	4	3	3	3
100	NL	1	14	3	5	3	1	2	1	1	1	4	2	3	4	3	3	2	1	5	4	1	2	4	2	2	5	5	5	1	5	4	2	2	1	5	5	5	5	5	5	4	3	2	1	4	3	4	4
100	NL	2	14	3	4	3	1	1	1	1	1	3	2	4	5	3	3	3	2	5	4	2	4	3	3	1	4	4	4	1	4	5	2	2	1	3	5	5	1	3	5	3	4	4	4	4	3	3	3
100	NL	2	14	3	4	3	1	2	1	1	2	4	3	4	5	5	3	3	1	5	3	2	3	2	3	2	5	5	4	2	4	4	3	4	3	3	5	4	2	4	5	3	3	3	3	3	3	3	4
100	NL	2	13	3	3	2	1	2	1	1	1	4	2	4	5	4	4	4	2	4	5	3	3	2	2	3	4	4	5	1	4	5	3	2	3	4	4	5	1	4	5	4	2	2	3	4	3	3	4
100	NL	1	12	3	3	3	1	2	1	1	1	4	1	2	5	3	4	3	2	5	4	1	3	1	4	1	5	5	4	3	1	5	2	3	1	4	5	3	2	1	5	3	1	3	1	5	3	1	5
100	NL	2	13	11	4	8	1	2	1	1	1	4	1	3	5	3	3	3	2	3	2	1	3	2	3	1	5	4	5	3	4	5	2	3	2	5	4	5	3	4	4	4	4	3	3	5	4	3	3
100	NL	2	14	3	5	2	1	2	1	1	1	4	3	5	5	4	5	4	3	4	4	2	3	3	2	3	5	5	5	2	3	5	2	2	3	4	4	5	3	3	4	3	4	5	3	5	3	2	4
100	NL	1	13	10	4	3	2	2	1	1	1	3	1	3	5	4	3	2	2	5	2	1	1	3	4	4	5	5	5	4	4	5	3	4	1	4	5	5	5	5	5	1	4	4	4	2	2	2	4
100	NL	2	13	11	4	6	1	1	1	1	1	4	2	5	5	4	4	3	3	5	3	1	3	1	4	1	4	5	5	3	3	4	1	2	1	4	5	5	3	3	4	5	3	3	2	4	2	3	4
100	NL	2	13	3	4	3	2	2	1	2	1	5	2	3	5	5	3	3	4	5	5	2	3	3	4	2	5	5	5	3	5	4	2	2	2	5	5	5	2	5	5	5	5	5	5	4	2	2	5
100	NL	2	12	3	3	3	1	2	1	1	1	5	3	5	5	4	4	4	2	4	4	2	4	2	3	2	5	5	5	3	3	4	2	3	2	5	5	5	4	4	5	5	4	3	2	4	3	3	5
100	NL	1	14	11	3	3	1	1	1	1	1	3	2	4	5	1	2	2	1	3	3	1	2	3	4	3	5	5	5	3	3	5	3	3	3	5	5	5	4	5	5	3	4	4	3	4	3	3	4
100	NL	2	12	11	3	2	1	2	1	1	1	4	4	5	5	4	4	4	3	4	4	1	4	2	4	1	5	4	5	2	5	5	2	1	1	4	5	5	1	5	5	5	3	2	3	3	3	3	4
100	NL	2	13	8	3	6	2	2	1	1	1	5	3	3	5	5	2	2	3	3	2	1	1	4	4	4	5	5	5	3	2	4	3	3	3	5	5	5	5	3	5	5	5	2	1	5	5	1	4
100	NL	2	12	11	3	6	1	2	1	1	1	4	1	1	5	4	4	3	3	3	2	1	1	2	4	1	5	5	5	1	3	3	2	3	1	5	5	5	2	2	1	5	1	1	1	1	1	3	5
100	NL	2	12	11	3	6	1	2	1	1	1	5	3	5	5	5	2	2	1	2	3	2	1	3	3	3	5	5	5	3	4	3	1	4	2	4	4	4	4	3	3	3	2	2	3	3	1	4	3
100	NL	1	12	11	3	6	1	2	1	1	1	4	1	3	5	4	3	2	1	4	3	1	2	3	4	2	5	5	5	4	4	5	4	4	3	5	4	5	4	5	5	5	3	4	2	5	2	4	4
100	NL	1	12	7	3	8	1	2	1	1	2	3	1	4	5	4	3	2	2	4	2	2	3	1	2	1	5	5	5	5	4	5	2	4	2	5	4	5	3	3	5	5	1	4	4	5	4	1	5
100	NL	2	15	3	5	3	1	2	1	1	1	4	2	3	5	4	3	3	3	4	4	2	3	2	3	1	4	4	4	3	3	4	3	1	2	4	4	4	4	4	4	4	4	2	2	4	4	4	4
100	NL	1	10	2	1	4	1	2	1	1	1	5	1	4	5	3	3	3	1	5	3	1	2	3	4	2	5	5	5	3	5	5	2	4	2	5	5	5	3	5	5	5	5	1	4	3	3	4	4
100	NL	2	11	2	2	4	1	2	1	1	1	3	2	5	5	4	4	4	2	4	3	2	3	2	3	2	5	5	5	2	3	5	2	2	3	5	5	5	3	4	5	3	3	4	4	5	4	2	4
100	NL	2	12	3	3	2	2	2	1	1	1	3	2	5	5	5	4	3	2	4	3	2	2	4	4	3	4	5	5	4	4	4	2	2	2	4	4	5	4	4	5	4	2	3	1	5	5	4	4
100	NL	2	10	2	1	4	2	2	1	2	1	2	4	4	5	5	4	4	1	4	3	2	1	4	3	4	5	5	5	1	4	3	3	3	3	5	5	5	4	5	5	1	5	1	2	5	2	2	4
100	NL	2	15	3	5	3	1	2	1	1	1	3	2	5	5	4	4	3	1	3	4	1	2	3	3	3	5	5	5	4	4	5	3	3	2	5	5	5	4	5	5	5	2	4	2	4	2	2	4
100	NL	2	14	7	4	6	1	2	1	1	1	5	2	3	5	4	2	2	2	5	4	1	3	2	2	1	4	4	5	3	2	4	2	2	1	5	3	5	3	2	5	5	3	2	1	3	2	1	4
100	NL	1	13	10	4	6	1	2	1	1	1	4	2	4	5	4	4	3	4	3	2	5	2	2	4	2	5	5	5	2	2	5	2	4	2	5	4	5	2	2	5	1	3	4	1	2	1	2	3
100	NL	2	11	2	2	4	1	1	1	1	1	3	1	4	5	4	3	3	2	5	3	2	2	3	4	1	5	5	5	3	5	4	3	3	2	5	5	5	3	4	4	4	1	3	2	3	4	4	3
100	NL	2	10	2	1	4	2	2	1	1	1	3	2	2	4	3	2	2	2	2	2	1	2	3	4	3	5	5	4	4	5	5	4	4	3	5	5	4	4	5	5	4	3	2	1	5	1	2	5
100	NL	2	11	2	2	4	1	1	1	2	1	2	1	2	4	2	4	3	2	4	2	4	4	3	3	3	5	5	5	1	5	5	3	2	3	5	4	4	3	4	4	3	3	1	1	3	2	4	3
100	NL	1	11	2	2	4	2	1	1	1	1	4	4	4	5	5	3	3	4	3	3	5	3	4	3	4	5	5	5	3	5	5	4	3	4	5	5	5	3	5	5	5	5	5	4	3	3	4	4
100	NL	2	13	10	3	6	2	2	1	2	1	4	1	5	5	5	4	3	1	3	3	3	3	4	4	1	5	5	5	1	4	5	1	4	2	5	5	5	2	4	5	5	3	2	1	3	5	2	5
100	NL	1	14	11	5	3	2	2	1	1	1	4	2	2	5	4	2	2	1	4	4	1	3	4	4	4	5	5	5	3	1	4	4	4	4	5	5	5	3	1	4	5	5	5	5	3	3	3	5
100	NL	2	13	11	3	1	2	2	1	1	1	5	3	5	5	4	5	5	3	3	2	3	1	2	4	1	5	5	5	2	4	4	3	3	3	5	5	5	3	5	5	5	4	4	1	5	3	2	5
100	NL	2	12	3	3	3	1	2	1	1	1	3	1	3	5	3	3	3	2	3	4	3	2	3	3	2	4	5	5	3	3	4	3	3	2	5	5	5	4	4	4	4	3	2	2	5	4	2	4
100	NL	2	13	10	4	6	2	1	1	1	1	3	1	5	5	4	3	3	3	4	3	2	4	3	3	2	4	5	5	3	4	5	3	2	3	4	4	4	3	3	5	3	2	5	3	4	1	3	3
100	NL	2	14	3	5	3	1	2	1	1	1	4	2	4	5	3	3	2	2	4	4	2	4	4	4	2	5	4	5	1	4	5	2	3	2	5	4	5	1	4	5	4	4	4	1	2	2	2	5
100	NL	2	12	11	3	6	1	2	1	1	1	4	1	3	5	5	3	2	2	5	4	3	4	2	4	1	5	5	5	3	3	4	2	4	2	5	5	5	4	5	5	3	4	1	2	4	3	5	3
100	NL	2	14	3	5	3	2	2	1	2	1	4	2	5	5	3	4	3	2	3	4	2	3	3	3	2	5	5	5	2	3	3	3	2	2	4	5	5	4	3	5	4	4	5	2	4	3	3	5
100	NL	1	14	11	5	2	1	2	1	1	1	4	2	4	5	4	3	2	3	4	3	2	3	3	4	2	3	4	3	3	2	3	3	3	2	3	3	2	3	2	3	4	4	5	2	3	3	2	4
100	NL	2	13	3	5	3	1	1	1	1	2	4	2	4	5	3	3	4	2	5	3	1	2	3	3	2	3	4	5	2	3	3	3	3	2	4	4	5	2	3	3	2	4	1	3	4	3	4	4
100	NL	1	13	11	4	3	1	1	1	1	1	3	1	4	5	4	3	2	1	5	3	2	2	3	4	2	4	4	5	2	3	4	2	4	1	5	5	5	3	4	5	1	4	4	1	3	1	1	3
100	NL	1	10	2	1	4	1	1	1	1	1	5	5	5	5	5	5	5	1	4	1	1	1	4	4	4	5	5	5	5	5	5	3	3	3	5	5	5	5	5	5	5	1	1	1	5	1	3	5
100	NL	1	15	10	5	2	2	2	1	1	1	5	1	5	5	4	5	5	4	5	1	1	4	1	4	1	5	5	5	5	5	5	1	4	1	5	5	5	5	5	5	5	3	2	1	5	1	1	5
100	NL	2	12	8	3	3	1	2	1	1	1	5	2	5	5	2	5	5	2	3	5	2	4	4	4	1	5	5	5	2	2	5	3	3	3	5	4	4	2	3	5	5	3	5	3	5	3	3	5
100	NL	3	12	11	3	6	1	2	1	1	1	4	1	3	5	4	3	2	2	5	3	1	3	2	2	2	5	4	5	3	5	4	2	2	1	5	5	5	5	5	5	3	1	1	2	4	3	4	2
100	NL	2	14	8	5	3	1	2	1	1	1	4	2	4	5	4	2	2	3	5	4	2	2	2	2	3	4	4	5	1	2	5	2	2	2	5	4	5	2	3	5	4	3	5	1	5	3	3	5
100	NL	2	14	11	5	6	1	2	1	1	1	4	3	4	5	4	4	3	1	4	4	1	3	3	4	3	5	4	5	2	3	4	3	4	4	4	4	5	4	3	4	4	4	3	1	4	3	3	4
100	NL	2	14	7	4	6	2	2	1	2	1	4	2	4	5	5	5	4	2	4	4	2	4	2	4	1	5	5	5	1	5	5	3	2	1	5	5	5	1	5	5	4	2	2	1	4	1	2	4
100	NL	1	14	11	5	3	1	1	1	1	1	4	1	5	5	3	3	2	1	4	2	2	4	4	4	3	5	5	5	2	5	5	2	3	2	5	5	5	4	5	5	5	5	3	4	3	2	4	5
100	NL	1	10	2	1	4	1	2	1	1	1	4	1	3	5	3	2	2	1	4	3	1	1	4	4	4	4	5	5	4	2	4	3	3	3	5	5	5	3	2	5	4	3	4	1	4	3	2	4
100	NL	2	13	3	4	3	1	1	1	1	1	3	4	4	5	4	4	2	2	4	4	3	3	4	3	2	3	4	4	1	3	4	2	2	2	3	5	5	1	2	4	3	4	2	3	3	2	2	4
100	NL	1	14	3	5	3	1	1	1	1	1	4	1	2	5	4	2	2	2	5	2	2	2	2	2	2	3	4	4	3	2	3	2	2	2	3	4	4	1	1	5	3	3	3	3	3	3	2	4
100	NL	2	14	3	4	3	1	1	1	1	1	4	2	4	4	3	3	3	2	3	4	1	3	4	4	3	4	5	4	2	4	3	3	3	3	4	4	4	2	4	5	5	3	3	4	2	2	3	4
100	NL	2	13	11	4	3	2	2	1	1	1	3	1	4	5	3	2	2	2	4	4	2	3	2	2	2	5	5	5	2	4	4	2	2	2	4	5	3	1	4	4	3	4	4	1	3	1	2	4
100	NL	2	14	11	5	3	1	2	1	1	1	4	2	3	5	4	3	2	3	5	3	2	2	4	4	3	5	5	5	3	2	5	2	3	1	5	5	5	5	5	5	5	4	5	2	3	3	1	4
100	NL	2	13	3	3	3	1	2	1	1	1	4	2	5	5	3	3	3	2	3	5	2	3	3	4	2	5	5	5	2	2	5	2	3	2	5	5	5	2	2	5	3	2	5	1	5	5	4	4
100	NL	2	14	11	4	6	1	2	1	1	2	4	2	3	5	4	3	2	2	3	2	1	3	2	3	2	5	5	5	2	4	5	2	4	2	5	5	5	2	5	5	4	3	3	3	2	2	1	4
100	NL	1	13	8	4	3	2	2	1	1	1	3	2	3	4	4	3	2	3	3	3	1	2	2	3	2	4	4	5	3	4	4	2	3	2	4	4	5	3	5	4	3	3	4	1	4	1	1	3
100	NL	1	12	3	3	3	2	2	1	1	1	5	1	3	5	5	3	3	1	5	4	1	1	3	4	1	2	5	5	4	3	1	2	3	1	4	5	5	5	4	5	2	4	4	2	3	3	3	3
100	NL	1	11	2	2	4	1	1	1	1	1	5	2	5	5	5	3	2	2	5	2	1	1	4	4	1	5	5	4	3	3	2	2	3	1	5	5	3	3	3	2	5	4	5	4	3	2	4	5
100	NL	2	13	8	4	3	1	2	1	1	1	4	2	4	5	5	5	5	3	2	3	2	2	2	3	2	5	5	5	4	4	4	3	4	2	5	5	5	4	4	5	4	5	4	5	4	4	4	4
100	NL	2	11	2	2	4	2	1	1	1	1	4	2	5	5	4	3	2	2	5	2	1	2	3	4	2	5	5	5	3	3	4	3	3	2	5	5	5	4	4	5	5	3	5	2	4	4	5	5
100	NL	2	10	2	1	4	1	2	1	1	1	4	2	5	5	5	4	4	2	3	2	1	1	1	4	2	5	5	5	5	4	5	3	4	3	5	5	5	5	5	5	5	2	1	1	4	1	1	4
100	NL	1	13	11	4	6	1	2	1	1	1	3	1	3	5	5	3	3	1	3	3	1	1	4	4	2	5	1	5	2	2	4	2	3	2	5	2	5	2	1	4	5	5	2	1	2	2	1	4
100	NL	2	13	8	4	6	1	2	1	1	1	3	1	5	5	4	5	4	2	4	1	1	2	4	4	3	5	5	5	3	5	5	4	4	2	5	5	5	3	5	5	5	2	3	1	4	1	1	5
100	NL	2	12	11	3	1	1	2	1	1	1	5	3	5	5	5	3	3	2	5	4	3	3	2	3	1	5	5	5	2	4	5	2	4	2	5	5	5	3	4	5	4	4	5	1	4	4	2	4
100	NL	1	13	11	3	2	2	2	1	1	1	4	2	4	5	4	4	2	3	2	4	3	3	2	2	2	4	5	5	4	4	5	2	4	3	4	4	4	5	3	5	4	4	3	4	2	2	2	4
100	NL	1	15	11	5	1	2	2	1	2	1	4	2	5	5	4	3	3	4	2	3	1	2	4	4	2	5	5	5	4	3	5	3	3	3	4	5	5	4	3	5	4	5	5	1	4	3	2	5
100	NL	2	13	7	4	6	1	2	1	1	1	4	3	4	5	5	2	1	2	5	2	1	2	4	3	3	5	5	4	1	5	3	3	3	2	5	5	4	1	5	3	4	3	5	1	3	1	1	3
100	NL	2	13	8	4	3	1	2	1	1	1	3	3	4	5	3	3	3	2	3	3	1	3	3	4	3	5	5	5	2	4	5	3	4	2	5	5	5	4	5	5	5	3	1	3	2	1	2	5
100	NL	2	15	11	5	3	2	2	1	1	1	4	2	3	5	4	4	3	2	4	3	1	1	3	4	3	4	5	5	2	3	5	3	3	3	5	4	4	4	4	5	5	5	2	1	1	1	1	5
100	NL	2	14	8	4	6	1	2	1	1	1	4	1	5	5	4	2	2	1	4	3	3	1	3	3	2	5	5	5	2	4	5	4	3	2	5	5	5	2	3	4	3	3	5	2	5	5	4	4
100	NL	2	14	3	5	3	1	1	1	1	1	4	2	4	5	4	3	3	1	4	3	1	3	1	2	1	4	4	2	3	4	4	2	3	1	4	5	4	4	5	4	4	5	2	1	4	4	3	4
100	NL	1	13	11	4	2	1	2	1	1	1	3	1	4	5	5	3	2	3	2	3	1	1	2	3	1	3	3	5	1	2	4	3	4	1	4	3	5	1	1	3	3	5	5	1	5	2	2	5
100	NL	1	10	2	1	4	1	2	1	1	2	3	2	3	5	4	3	2	1	3	2	2	1	2	3	1	4	4	5	2	3	4	2	4	2	5	4	5	2	3	4	5	5	2	3	3	2	3	5
100	NL	2	15	3	5	3	2	1	1	1	1	4	3	4	5	4	3	3	2	4	3	1	2	4	3	2	5	5	4	3	4	5	3	3	3	5	5	4	4	3	5	4	4	3	2	3	3	2	4
100	NL	1	11	2	2	4	2	1	1	1	1	4	3	5	5	5	3	3	2	4	3	1	1	3	4	2	5	4	5	5	5	5	3	3	2	5	4	5	5	5	5	4	5	2	1	4	2	2	5
100	NL	2	14	3	5	3	1	1	1	1	1	4	2	3	5	4	3	2	2	5	4	1	3	4	3	3	4	4	5	3	3	5	4	3	3	5	5	5	2	3	5	3	2	3	1	5	3	2	3
100	NL	1	13	11	4	1	1	2	1	1	1	3	3	5	5	5	3	2	1	3	3	3	2	2	2	2	5	5	5	2	5	5	2	2	2	5	5	5	2	5	5	5	2	2	1	4	3	2	4
100	NL	2	13	8	4	3	1	2	1	1	1	4	2	5	5	4	3	3	2	4	3	2	3	4	4	2	5	5	5	2	2	5	2	2	2	5	5	5	4	5	5	4	4	4	1	4	4	4	4
100	NL	2	13	11	4	8	1	2	1	1	1	4	2	3	5	4	3	2	1	3	3	1	2	3	4	1	4	5	5	2	3	4	2	2	1	4	4	4	1	2	3	3	2	5	1	3	1	2	3
100	NL	1	13	3	3	2	1	2	1	1	1	3	4	4	5	4	2	2	2	4	4	4	4	3	3	4	3	5	4	1	2	1	3	2	2	4	5	5	2	2	3	5	4	3	4	4	2	4	4
100	NL	1	12	3	3	2	1	2	1	1	1	4	2	4	5	5	3	3	2	4	4	2	2	2	3	2	5	5	5	3	5	5	2	2	2	5	5	5	2	5	5	4	2	3	1	4	3	2	4
100	NL	2	14	7	4	6	1	2	1	1	1	3	1	1	5	4	1	1	3	4	2	2	3	2	2	1	3	3	3	1	2	1	2	2	1	1	2	3	1	1	1	1	4	3	1	2	2	2	3
100	NL	1	13	3	4	3	1	1	1	1	1	4	2	5	5	4	3	3	3	5	5	2	4	4	4	2	4	3	5	1	4	5	4	4	4	4	4	5	5	4	5	4	4	3	1	3	1	3	5
100	NL	1	11	2	2	4	2	1	1	1	1	4	2	4	5	5	3	3	2	4	3	1	1	4	3	2	5	5	5	4	4	4	3	3	2	5	5	5	3	3	5	5	3	1	2	4	2	3	4
100	NL	2	14	11	4	2	1	2	1	1	1	4	3	5	5	3	4	3	4	4	1	3	3	2	4	2	5	5	5	2	3	5	4	4	4	5	5	5	3	3	5	5	5	1	1	5	1	1	5
100	NL	1	14	11	4	3	2	1	1	1	1	4	1	4	5	3	3	3	1	4	1	1	2	2	3	1	4	5	5	3	1	5	2	3	1	5	5	5	3	1	5	4	3	2	1	3	1	3	5
100	NL	2	15	11	5	2	1	2	1	1	1	5	3	5	5	5	4	4	3	4	4	1	2	4	4	2	5	5	5	2	4	4	3	3	3	5	5	5	5	5	5	5	3	5	1	4	4	1	5
100	NL	2	13	11	3	8	1	2	1	2	1	4	4	3	5	4	2	3	1	4	5	1	1	2	3	3	5	5	5	2	1	4	3	2	2	5	4	5	1	2	4	3	4	4	3	3	3	3	4
100	NL	2	14	10	4	3	2	1	1	1	1	4	1	5	5	4	4	3	1	4	3	1	2	4	4	2	5	5	5	3	5	5	3	3	3	5	5	5	5	5	5	4	5	3	1	2	3	3	5
100	NL	2	15	3	5	3	1	2	1	1	1	4	1	3	5	2	3	3	1	2	4	1	2	2	2	2	4	4	4	1	3	3	2	2	2	5	5	5	3	5	5	4	4	1	3	3	2	2	4
100	NL	2	15	11	5	1	2	2	1	1	1	5	3	3	5	5	3	3	1	2	3	1	2	2	2	2	5	5	5	1	4	3	3	4	2	5	5	5	2	4	3	1	2	2	1	3	1	2	3
100	NL	1	12	3	3	3	1	2	1	1	1	3	1	4	5	5	3	2	2	3	4	2	2	3	2	2	5	4	5	4	3	5	3	4	2	5	4	5	4	3	5	5	4	3	1	4	2	3	4
100	NL	1	12	3	3	3	2	2	1	1	1	4	1	3	5	5	3	3	2	4	4	1	2	2	3	2	5	5	5	5	3	5	2	1	2	5	5	5	5	2	5	4	4	1	4	4	2	1	5
100	NL	1	13	10	4	3	2	2	1	1	1	4	1	3	5	2	3	2	1	3	3	1	2	2	4	2	5	5	4	3	4	5	3	3	3	5	5	5	5	5	5	4	4	5	2	3	2	3	4
100	NL	3	14	8	3	3	1	2	1	1	1	4	3	5	5	4	4	3	2	3	3	1	3	2	4	1	4	5	5	3	4	5	2	3	1	5	5	5	3	4	5	5	5	1	2	4	2	4	5
100	NL	1	13	8	4	6	2	2	1	1	1	4	2	4	5	4	3	2	3	4	2	3	2	4	3	2	4	4	5	3	4	4	2	4	3	2	4	4	1	3	5	5	5	5	1	3	3	1	4
100	NL	2	12	2	2	4	1	2	1	1	1	3	2	4	5	3	3	2	3	4	3	3	4	3	3	3	4	4	4	3	4	5	3	3	3	3	5	5	3	4	4	5	2	3	3	4	3	3	4
100	NL	2	14	7	4	6	1	2	1	1	1	5	2	4	5	4	4	2	2	5	4	2	3	3	4	3	4	5	5	3	2	4	2	3	2	3	5	5	1	1	4	4	2	2	1	3	2	1	4
100	NL	1	14	11	4	6	1	1	1	1	1	4	2	3	5	4	3	2	1	5	3	1	2	3	3	1	3	4	5	2	3	5	2	2	1	3	5	5	2	3	5	4	2	1	1	2	2	2	4
100	NL	1	13	3	4	3	1	2	1	1	1	4	2	3	5	4	2	2	1	3	4	1	1	3	3	3	4	4	5	3	2	2	3	3	3	5	4	5	3	4	4	3	1	1	1	2	1	1	3
100	NL	2	13	8	3	6	2	2	1	2	1	4	3	4	5	5	3	3	3	5	4	3	3	2	2	2	3	4	4	4	4	5	1	2	3	2	4	5	4	4	5	4	2	5	1	4	4	3	3
100	NL	1	12	10	3	3	2	2	2	1	2	1	5	1	1	1	1	1	1	2	4	5	4	2	3	4	4	2	4	1	3	5	2	1	1	2	2	4	1	3	5	1	1	5	1	1	1	1	3
100	NL	1	12	8	3	6	1	2	1	1	1	4	3	4	5	5	4	2	2	4	2	1	2	3	3	4	5	5	5	2	4	4	3	3	2	4	4	5	2	3	5	4	3	4	2	4	3	3	4
100	NL	1	12	8	3	6	2	2	1	1	1	4	1	5	3	3	4	4	3	4	5	2	3	3	4	3	5	5	5	2	5	5	3	4	4	5	5	5	4	5	5	3	5	2	4	5	2	1	3
100	NL	2	12	8	3	3	1	2	1	1	1	5	3	5	5	4	4	3	3	5	5	2	4	3	4	3	5	5	5	1	5	5	2	4	4	5	5	5	2	4	5	5	3	2	5	5	4	3	5
100	NL	1	14	11	5	2	1	1	1	1	1	3	1	4	5	3	3	2	2	4	4	2	3	2	3	1	5	3	5	2	4	5	2	3	2	5	3	5	2	4	5	3	3	1	1	4	1	2	3
100	NL	1	13	8	4	3	1	1	1	2	1	3	1	4	5	4	3	1	1	2	1	1	1	2	3	1	4	4	4	2	1	5	3	3	2	4	4	4	2	2	5	4	1	3	1	4	1	1	3
100	NL	2	14	7	5	3	1	2	1	1	1	4	2	5	5	4	4	4	3	5	3	1	4	2	2	1	5	4	5	3	3	4	2	2	1	5	4	5	4	3	5	4	4	4	3	5	3	1	4
100	NL	1	15	7	4	6	2	2	1	1	1	3	1	5	5	5	2	1	1	3	3	1	1	3	3	2	5	5	5	2	3	3	2	2	2	5	5	5	4	4	5	4	2	1	1	3	1	1	4
100	NL	2	14	10	4	3	2	2	1	1	1	4	3	5	5	3	4	2	2	3	1	1	2	3	4	4	5	5	5	3	5	5	2	4	3	5	5	5	3	4	5	2	4	4	3	5	2	3	3
100	NL	1	12	3	3	3	2	2	1	2	1	3	2	4	5	3	3	3	1	5	2	1	2	3	4	2	4	4	5	3	4	4	2	2	2	4	4	5	4	3	5	4	4	4	1	4	4	4	4
100	NL	1	13	3	4	3	2	1	1	1	1	4	2	4	5	4	3	3	1	3	5	1	1	3	3	3	5	5	5	5	5	5	2	2	2	5	4	5	1	1	5	3	2	1	1	4	4	1	4
100	NL	2	14	3	4	3	1	2	1	1	1	4	2	3	5	4	3	2	2	4	5	2	4	3	4	4	5	5	5	2	3	4	3	3	3	5	5	5	2	2	5	3	4	4	4	4	3	3	4
100	NL	2	13	3	4	2	1	2	1	1	1	5	2	4	5	5	3	3	2	4	3	2	1	3	4	3	4	5	5	2	3	4	3	4	3	5	4	4	2	3	4	5	3	3	1	4	4	3	4
100	NL	1	13	10	3	3	1	2	1	1	1	5	2	5	5	5	3	3	2	5	4	1	2	2	3	2	5	4	5	3	2	5	2	2	2	5	5	5	5	5	5	4	4	2	1	4	2	3	5
100	NL	2	12	7	3	6	1	2	1	1	1	3	2	4	5	5	3	3	1	4	4	2	2	3	3	2	4	5	4	2	4	4	2	3	2	4	4	4	2	4	5	4	2	2	1	3	3	3	4
100	NL	1	15	3	5	3	2	2	1	1	1	3	2	4	5	3	5	5	1	5	5	1	3	4	4	4	5	5	5	4	4	5	3	3	3	5	5	5	4	4	5	5	5	3	1	4	2	1	5
100	NL	2	12	8	3	3	2	2	1	1	1	5	2	4	5	3	3	3	1	4	2	1	2	4	4	2	5	5	5	4	5	2	2	4	2	5	5	5	4	5	4	4	3	2	3	4	3	4	4
100	NL	2	14	8	5	3	1	2	1	1	1	5	2	4	5	4	3	3	1	4	3	1	3	2	4	1	5	5	5	4	3	4	2	3	2	5	5	5	2	2	4	5	1	3	2	5	2	1	5
100	NL	2	12	8	3	6	1	2	1	1	1	4	2	3	5	4	3	2	1	4	4	2	2	2	3	1	5	5	5	2	4	2	2	3	1	5	5	5	2	4	3	2	5	2	1	5	3	3	4
100	NL	2	15	7	5	3	1	2	1	1	1	4	3	5	5	4	4	3	2	4	3	3	3	3	3	3	5	5	5	3	3	4	2	2	2	5	5	5	5	4	5	4	2	2	3	2	2	2	4
100	NL	2	14	8	5	3	1	2	1	1	1	3	2	5	5	4	4	3	2	4	3	1	2	3	2	2	4	4	5	2	3	4	2	2	1	5	4	5	2	3	4	4	4	3	3	2	2	3	4
100	NL	2	14	7	5	3	1	2	1	1	1	4	2	4	4	4	4	2	2	5	4	2	2	4	4	4	4	5	3	3	2	3	2	2	2	4	4	4	1	2	3	4	2	3	3	4	3	3	3
100	NL	2	12	8	3	3	1	2	1	1	1	3	2	4	5	4	3	2	3	4	2	2	3	3	2	2	5	4	5	2	3	5	2	3	2	5	4	5	2	2	5	5	3	5	1	4	4	3	4
100	NL	2	12	2	2	4	1	1	1	2	1	4	3	4	5	5	4	3	2	4	3	3	3	4	4	2	5	5	5	4	5	3	2	2	2	5	5	5	5	5	5	5	2	4	1	4	3	4	4
100	NL	2	14	7	4	6	1	2	1	1	1	5	1	5	5	5	5	4	4	5	4	2	2	2	4	1	5	5	5	2	2	5	3	2	3	4	5	5	3	3	4	5	2	1	3	4	1	1	5
100	NL	2	14	11	5	1	1	2	1	1	1	4	2	4	5	4	4	2	2	5	4	1	2	3	3	2	5	5	5	2	4	3	2	3	1	3	4	5	1	5	3	5	4	5	1	3	4	3	5
100	NL	1	14	10	4	3	1	1	1	1	1	3	1	5	5	4	5	4	3	3	2	1	1	4	4	2	5	5	5	4	4	5	3	4	2	5	5	5	5	5	5	3	1	1	3	5	1	1	4
100	NL	2	15	7	5	3	1	2	1	1	1	5	2	5	5	4	4	4	1	5	4	1	2	2	4	2	5	5	5	2	3	5	3	3	2	5	5	5	4	4	5	2	1	1	3	5	2	2	4
100	NL	1	13	3	4	3	1	1	1	1	1	5	1	2	5	4	2	1	1	5	3	1	2	4	4	4	5	5	5	1	4	1	2	4	1	3	3	5	1	1	1	5	4	1	4	3	3	3	5
100	NL	1	12	11	3	6	1	2	1	1	1	3	1	4	5	3	4	3	1	5	3	1	1	3	4	2	5	5	5	3	5	5	4	3	2	5	5	5	5	5	5	4	3	5	5	5	1	3	5
100	NL	1	13	11	4	8	1	2	1	1	1	2	1	4	5	4	3	1	1	4	3	1	2	3	4	2	5	4	4	2	3	3	2	3	2	5	4	5	2	3	3	5	2	3	1	3	3	3	5
100	NL	1	13	7	3	1	1	2	1	1	1	3	4	5	5	3	2	2	2	4	5	5	3	4	4	4	5	5	5	4	2	5	4	4	4	3	5	5	3	5	5	5	5	1	1	4	1	1	5
100	NL	1	14	11	4	6	1	1	1	1	1	4	2	3	4	1	3	2	2	3	2	3	4	2	3	3	5	5	5	2	2	4	4	3	2	5	5	5	3	2	5	4	4	3	2	3	3	3	4
100	NL	2	11	2	2	4	1	1	1	1	1	4	2	3	5	4	3	3	2	4	5	2	2	3	4	3	5	5	4	3	3	4	3	4	3	5	5	3	2	2	4	5	4	5	1	4	3	2	5
100	NL	2	14	11	4	1	2	2	1	1	1	5	3	5	5	5	4	3	1	3	1	1	1	2	4	2	5	5	5	1	3	5	2	4	2	5	5	5	1	1	5	5	1	5	1	5	1	3	5
100	NL	1	11	2	2	4	2	1	1	1	1	2	1	4	5	5	4	2	1	5	4	1	2	3	4	2	5	5	5	1	5	4	4	1	2	5	5	4	1	5	4	5	4	1	4	3	4	4	3
100	NL	2	13	3	3	3	1	2	1	1	1	4	1	5	5	3	4	3	2	5	3	3	5	2	4	2	4	5	5	1	4	3	2	3	4	4	5	5	2	4	3	4	3	4	1	5	3	4	4
100	NL	2	13	3	4	3	2	1	1	1	1	4	2	4	5	5	4	1	1	4	5	1	2	4	4	3	4	5	5	2	2	5	3	2	2	3	5	4	4	3	5	2	5	5	1	5	1	2	4
100	NL	2	15	11	5	1	1	2	1	1	1	4	5	5	5	3	4	3	2	2	1	1	1	4	4	4	5	5	5	4	5	5	3	4	3	5	5	5	4	5	5	4	2	3	2	4	4	2	5
100	NL	1	14	7	3	6	1	2	1	1	1	5	2	5	5	4	3	4	1	5	3	1	4	2	3	3	5	5	5	2	4	4	3	3	3	5	5	5	2	2	5	4	1	1	1	4	1	1	5
100	NL	1	15	3	5	3	1	2	1	1	1	4	3	3	5	4	3	3	3	3	4	2	2	3	3	2	4	3	5	1	3	5	2	2	2	4	3	5	2	3	5	4	4	3	1	4	4	2	4
100	NL	2	10	2	1	4	2	2	1	1	1	3	1	5	5	4	3	3	1	4	4	2	2	2	4	1	5	5	5	1	5	5	2	4	1	5	5	5	2	5	5	3	3	4	3	4	3	3	5
100	NL	2	14	11	5	3	1	2	1	1	1	4	2	5	5	4	3	3	2	3	2	2	3	4	3	3	5	5	5	3	5	4	4	3	2	5	5	5	3	5	4	4	4	3	2	4	3	3	4
100	NL	2	12	11	4	8	1	2	1	1	1	4	1	4	5	3	4	3	3	5	3	2	3	4	4	2	4	3	5	3	4	5	2	4	2	4	4	5	4	4	5	3	3	4	1	3	1	2	4
100	NL	2	13	11	3	6	2	2	1	1	1	3	1	2	5	4	1	1	1	4	4	1	2	1	2	2	5	2	3	1	2	3	2	2	4	3	2	2	1	3	4	5	3	4	1	5	4	2	3
100	NL	2	12	11	3	1	1	2	1	1	1	4	1	5	5	4	4	4	1	4	5	1	2	3	4	2	5	4	5	3	2	5	3	3	4	5	5	5	4	4	5	5	4	3	4	4	2	2	5
100	NL	2	10	2	1	4	1	2	1	1	2	5	1	3	5	4	4	3	2	4	3	2	4	3	2	1	5	5	5	1	5	4	3	3	1	5	5	5	1	2	4	5	4	3	1	4	3	4	5
100	NL	2	11	2	2	4	1	1	1	1	1	3	3	4	5	5	2	2	2	5	3	2	3	2	3	2	5	5	5	4	4	4	2	4	2	5	5	5	4	4	5	5	5	2	3	4	4	4	4
100	NL	1	13	3	4	3	1	1	1	1	1	4	3	4	5	4	3	3	1	4	3	1	2	2	4	2	4	4	4	2	3	4	2	3	2	4	4	4	2	3	5	4	3	2	1	4	3	3	4
100	NL	1	11	2	2	4	1	1	1	1	1	3	2	4	5	3	2	1	2	4	3	3	3	2	4	3	5	5	4	3	4	5	2	4	3	5	5	5	3	4	5	4	3	4	3	4	5	4	4
100	NL	2	13	3	3	3	2	2	1	1	1	4	2	4	5	4	3	3	1	5	4	1	2	2	4	1	5	5	5	2	4	4	2	3	1	5	5	5	3	4	5	3	5	2	1	5	3	2	5
100	NL	2	10	2	1	4	2	2	1	1	1	3	1	5	5	3	4	5	1	3	2	1	3	3	3	2	5	5	5	3	4	5	3	4	2	5	5	5	3	4	5	4	4	2	1	5	2	3	4
100	NL	2	13	3	3	3	1	2	1	1	1	2	1	3	5	4	2	2	2	5	4	2	1	3	4	3	3	5	1	1	4	5	2	2	2	3	4	2	1	5	4	4	5	2	2	3	2	4	4
100	NL	2	14	3	5	3	1	2	1	1	1	4	2	4	5	3	2	2	2	4	3	1	2	1	4	3	4	4	5	1	2	3	1	3	4	5	5	5	2	3	5	4	3	3	1	5	5	2	4
100	NL	1	11	3	3	3	1	2	1	1	1	3	2	4	5	2	1	1	1	5	4	1	4	4	4	4	4	5	5	1	4	5	4	4	4	2	5	1	3	4	1	4	1	3	1	5	5	2	4
100	NL	1	12	3	3	2	1	2	1	1	1	4	1	4	5	4	3	2	3	4	3	2	1	2	4	2	5	5	5	2	3	4	3	3	2	5	5	5	5	4	5	4	3	3	3	5	2	1	4
100	NL	2	14	3	5	3	2	1	1	1	1	4	2	4	5	3	3	2	1	4	3	1	2	3	4	2	5	4	5	3	3	4	3	3	2	5	4	5	3	4	5	4	4	3	1	3	3	2	4
100	NL	1	11	2	2	4	2	1	1	1	1	3	2	4	5	4	4	3	2	1	1	2	2	2	4	2	4	5	4	4	4	4	3	4	4	4	5	4	3	4	4	3	4	2	5	4	4	4	4
100	NL	2	14	3	4	3	1	1	1	1	1	3	2	4	5	5	4	3	1	4	4	2	3	3	4	3	4	5	5	2	3	4	3	2	2	2	4	4	3	3	4	4	2	3	2	4	5	4	4
100	NL	1	13	3	4	3	1	1	1	1	1	3	1	2	5	3	3	2	1	5	4	1	2	4	4	4	4	5	5	2	4	3	4	4	4	5	5	5	3	5	5	5	3	3	1	5	3	4	5
100	NL	1	11	2	2	4	2	1	1	1	1	4	2	4	5	4	3	3	2	4	5	3	3	2	4	2	5	5	5	2	3	4	2	3	2	5	5	5	2	3	4	4	4	4	3	3	2	4	4
100	NL	1	11	2	2	4	1	1	1	1	1	3	1	4	4	5	2	2	1	5	3	2	1	2	4	1	4	5	5	2	5	2	3	4	1	5	5	5	2	4	2	4	4	2	5	2	2	4	5
100	NL	1	12	2	2	4	1	1	1	1	1	3	2	4	4	5	2	2	2	3	2	1	1	3	3	2	5	4	5	2	4	4	3	3	4	5	5	5	4	4	5	4	3	3	2	3	3	3	4
100	NL	1	15	3	5	3	2	2	1	1	1	5	2	5	5	4	4	4	2	5	5	1	2	3	4	3	5	5	5	2	3	5	3	2	1	5	5	4	1	2	4	4	5	3	5	3	2	2	5
100	NL	2	12	3	3	2	2	2	1	2	1	3	3	5	5	5	3	3	3	4	4	2	2	3	4	2	4	5	5	2	3	5	2	2	1	4	5	4	2	3	5	4	4	3	3	4	3	1	5
100	NL	1	13	3	3	3	1	2	1	1	2	4	1	4	5	3	4	2	1	5	4	1	3	3	3	2	5	5	5	3	3	4	3	4	2	5	5	5	2	1	3	5	1	1	1	4	3	4	4
100	NL	2	14	3	5	3	1	2	1	1	2	4	2	4	5	5	4	4	1	5	5	2	3	4	4	3	5	5	5	2	3	4	4	4	3	5	5	5	2	3	5	4	5	3	1	5	4	3	5
100	NL	2	14	3	4	3	1	1	1	1	1	4	3	3	5	5	4	3	2	5	3	1	2	3	3	1	4	5	5	1	3	2	2	2	1	4	5	5	1	3	3	5	5	5	2	5	5	3	4
100	NL	1	11	2	2	4	1	1	1	1	1	4	2	4	5	3	3	1	4	5	4	2	3	2	3	1	5	4	5	2	5	5	3	2	1	5	2	5	2	5	5	4	4	2	1	3	2	4	4
100	NL	1	11	2	1	4	1	2	1	1	1	5	2	5	5	5	3	3	3	4	2	1	1	3	4	2	5	4	5	3	2	5	2	2	2	5	4	5	3	2	5	5	3	1	1	4	3	4	4
100	NL	2	14	3	5	3	1	2	1	1	1	4	2	3	5	3	4	3	2	5	4	1	3	3	3	2	5	5	5	2	3	5	2	2	2	5	5	5	4	5	5	4	4	3	2	3	3	2	4
100	NL	2	11	2	2	4	1	2	1	1	1	5	3	5	5	5	3	3	5	3	2	1	1	3	3	1	5	5	5	2	5	5	3	3	2	4	5	5	2	5	4	4	3	5	2	3	2	4	3
100	NL	2	14	3	5	3	1	2	1	1	1	3	3	5	5	3	4	4	3	5	4	2	3	3	3	2	5	4	5	4	4	5	3	3	2	5	5	5	4	4	5	1	4	5	3	5	3	3	4
100	NL	1	12	2	2	4	1	1	1	1	1	2	1	4	5	3	4	3	1	4	5	1	2	2	4	2	5	5	5	3	4	4	2	4	2	5	5	5	4	5	5	5	3	2	1	5	4	3	5
100	NL	2	12	3	3	3	1	2	1	1	1	4	2	3	5	3	3	3	2	4	5	2	3	2	2	3	4	5	3	1	4	4	2	2	2	4	5	4	1	4	4	4	3	3	1	2	4	3	4
100	NL	1	12	3	3	3	1	2	1	1	1	4	2	5	5	5	3	3	1	5	4	2	1	4	4	1	5	5	5	1	4	5	3	3	1	4	5	5	2	5	5	5	4	5	3	5	2	1	5
100	NL	2	11	2	2	4	1	1	1	1	1	4	2	5	5	5	4	3	2	5	3	1	1	3	4	3	5	5	5	3	5	5	4	4	2	5	5	5	4	5	5	5	4	5	2	4	3	4	5
100	NL	1	12	3	3	3	2	2	1	1	1	3	2	5	5	3	3	3	3	4	4	2	3	3	4	4	1	5	5	1	3	5	3	4	3	5	5	5	1	3	5	3	3	4	1	3	3	2	4
100	NL	2	12	3	3	2	1	2	1	1	1	5	2	5	5	5	4	4	2	5	4	1	3	3	2	4	5	5	5	5	5	5	2	2	2	5	5	5	4	5	5	5	5	1	1	4	3	2	5
100	NL	1	14	3	5	3	1	2	1	1	1	4	2	3	5	3	4	3	1	5	5	1	3	4	4	2	4	5	5	2	3	5	3	1	2	5	5	5	5	5	5	4	3	3	1	3	3	1	5
100	NL	2	10	2	1	4	2	1	1	1	1	4	1	4	5	3	3	4	1	5	4	1	3	3	3	2	5	4	5	2	4	5	3	3	3	4	4	5	4	4	5	5	2	1	1	5	3	3	5
100	NL	2	13	3	4	3	1	2	1	1	1	3	1	4	5	4	3	3	2	5	4	3	2	2	2	2	4	4	5	2	2	5	2	2	1	2	4	5	3	3	5	5	3	3	1	3	3	2	5
100	NL	1	13	3	3	3	2	2	1	1	1	4	2	4	5	4	3	2	3	5	4	3	3	3	4	1	4	5	5	2	5	5	3	3	2	4	4	5	3	3	5	3	3	5	1	3	4	2	4
100	NL	1	13	3	3	3	1	2	1	1	1	3	2	5	5	5	1	1	1	4	4	1	1	2	4	2	5	5	5	2	3	4	2	1	1	5	5	5	1	2	5	4	2	5	1	3	2	1	4
100	NL	2	14	3	4	3	1	2	1	1	1	5	1	3	5	4	5	5	3	5	3	2	3	4	4	2	5	5	5	3	4	5	2	3	2	4	5	5	2	4	5	5	5	5	2	3	2	2	5
100	NL	1	12	3	3	3	2	2	1	1	1	3	1	3	4	3	2	1	1	4	2	1	2	2	2	2	4	4	4	3	3	4	2	2	2	4	4	4	3	2	4	4	3	1	3	1	2	2	4
100	NL	2	14	3	4	2	1	2	1	1	1	4	2	3	5	4	3	2	3	4	3	1	1	3	3	1	4	5	5	3	3	1	2	3	2	3	5	5	3	4	1	5	4	3	1	2	3	1	5
100	NL	1	12	3	3	3	2	2	1	1	1	3	2	4	5	2	1	1	2	5	4	1	3	3	3	1	5	5	5	3	4	5	3	2	3	4	4	5	3	4	5	5	4	3	1	5	3	2	4
100	NL	2	12	3	3	3	1	2	1	1	1	4	2	4	5	3	3	3	1	5	2	1	3	4	4	4	5	5	5	1	2	4	4	4	4	5	5	5	1	4	4	4	3	3	3	4	5	5	2
100	NL	1	15	3	5	2	2	2	1	1	1	3	1	5	5	2	4	4	4	3	5	2	3	2	4	1	4	5	5	5	5	5	2	1	3	4	4	5	5	5	5	2	1	5	1	3	2	1	4
100	NL	2	13	3	3	3	1	2	1	1	1	4	1	4	5	2	3	2	1	5	4	1	2	4	4	4	3	5	4	1	5	5	2	3	2	3	4	5	1	4	5	5	5	5	1	4	4	2	5
100	NL	1	12	3	3	2	1	2	1	2	1	3	1	5	5	5	4	2	3	2	4	1	3	2	4	3	5	4	4	3	5	4	2	4	3	5	5	5	2	5	4	4	3	3	1	5	4	4	4
100	NL	2	12	3	3	3	2	2	1	1	1	3	1	3	5	3	3	3	2	4	3	1	3	3	2	3	3	4	4	2	3	5	3	3	3	4	4	5	4	4	4	4	4	3	4	3	3	3	4
100	NL	2	12	3	3	3	1	2	1	1	1	4	1	3	5	4	3	2	1	5	4	1	1	3	3	2	5	4	5	2	3	4	3	3	2	4	4	5	2	3	4	4	2	1	4	5	2	2	5
100	NL	1	15	3	5	2	1	2	1	1	1	4	2	4	5	3	4	3	4	5	4	3	4	1	3	2	4	4	4	3	2	4	3	1	1	3	4	5	4	3	3	5	4	4	4	4	3	2	4
100	NL	1	13	3	4	2	1	2	1	1	1	3	1	4	5	3	3	2	1	4	3	1	1	3	4	4	3	4	5	1	2	4	3	3	3	3	4	5	2	3	5	5	2	3	3	4	4	3	5
100	NL	2	14	3	4	3	1	2	1	1	1	4	1	4	5	4	4	3	2	4	4	1	2	3	2	1	4	4	3	2	3	4	1	2	1	3	5	5	2	4	5	4	5	5	1	4	4	1	4
100	NL	2	14	3	4	3	1	1	1	1	1	4	1	3	5	5	1	1	2	4	4	1	2	2	4	1	5	5	5	2	4	5	2	4	1	3	3	4	2	4	5	3	5	1	1	5	1	3	4
100	NL	1	14	3	5	3	2	2	1	1	1	4	2	3	5	3	3	2	1	3	4	1	2	3	4	4	4	5	5	2	2	3	3	3	2	5	3	5	3	4	5	4	2	5	2	4	3	3	5
100	NL	1	13	7	4	6	1	2	1	1	1	4	1	2	5	3	2	2	2	4	4	1	3	2	4	1	5	4	5	3	1	5	1	4	1	4	5	5	2	1	5	4	2	3	3	3	2	2	4
100	NL	2	14	3	5	3	1	2	1	1	1	4	3	3	4	4	3	3	3	4	4	2	3	3	3	2	5	4	5	2	4	3	2	3	2	4	5	4	1	3	3	4	3	4	1	4	4	2	4
100	NL	2	14	11	4	1	1	2	1	1	1	3	3	4	5	4	2	3	2	3	3	2	3	2	3	2	5	4	5	3	3	4	2	2	1	4	5	5	3	3	5	4	4	4	1	3	3	1	3
100	NL	1	13	3	4	3	1	2	1	1	1	2	1	5	5	4	3	3	1	2	3	1	3	3	4	2	4	4	5	1	3	5	3	2	2	3	4	5	2	3	5	4	4	2	1	4	3	1	4
100	NL	2	13	11	3	1	1	2	1	1	1	4	1	3	5	5	3	3	1	5	5	2	1	3	3	2	5	5	5	1	4	4	2	3	1	4	5	5	1	3	3	3	4	5	1	3	3	3	4
100	NL	1	12	3	3	2	2	2	1	1	1	4	1	4	5	5	2	2	2	2	5	2	2	2	3	1	3	1	4	2	4	5	2	3	2	4	5	5	4	5	5	4	5	1	1	3	4	3	3
100	NL	1	13	11	3	3	2	1	1	1	1	4	2	4	5	4	3	2	1	4	4	1	2	2	2	2	5	5	4	2	3	4	2	3	2	4	4	4	2	3	4	4	4	2	3	3	2	3	4
100	NL	2	13	3	4	3	1	1	1	1	1	5	2	3	5	4	3	2	3	4	4	2	3	3	2	2	4	4	4	2	2	3	2	2	2	5	4	4	1	1	5	5	3	4	5	4	2	3	3
100	NL	1	11	2	2	4	1	1	1	1	1	4	2	4	5	5	4	3	1	4	3	2	2	3	4	3	5	4	5	2	3	4	3	3	2	5	4	5	3	3	5	4	5	3	2	3	2	3	4
100	NL	2	12	3	3	3	2	2	1	1	1	4	1	4	5	5	3	2	3	4	5	2	1	4	4	2	5	5	5	3	4	5	2	3	1	5	5	5	4	4	5	4	5	3	1	5	3	2	4
100	NL	2	15	3	5	3	1	2	1	1	1	4	1	2	5	3	3	2	3	5	4	2	3	2	3	1	4	4	5	2	3	2	2	2	1	5	4	5	1	3	5	3	4	1	1	3	2	2	5
100	NL	2	13	3	4	3	2	2	1	1	1	4	2	4	5	4	3	3	1	5	4	1	2	2	4	2	5	5	5	2	4	5	3	3	3	4	4	5	2	4	5	4	3	5	1	2	1	2	4
100	NL	1	12	3	3	2	1	2	1	2	1	4	1	5	5	4	3	3	1	4	2	1	2	4	3	2	4	5	5	3	4	3	4	4	2	4	5	5	4	4	5	4	3	4	2	4	3	3	4
100	NL	2	15	3	5	3	2	2	1	1	1	2	1	3	4	3	3	2	3	4	4	2	2	3	2	2	4	4	5	3	3	4	2	3	2	4	3	4	3	3	4	4	3	3	4	2	2	2	4
100	NL	2	12	11	3	6	1	2	1	1	1	3	3	5	5	5	2	2	4	5	5	5	5	4	4	4	5	5	5	3	5	5	4	4	4	5	5	5	3	5	5	5	4	3	4	4	3	3	4
100	NL	2	14	3	5	2	1	2	1	1	1	4	2	5	5	3	3	3	1	4	5	3	4	3	3	3	5	5	5	3	4	5	3	3	3	5	5	5	3	4	5	5	5	5	1	4	4	4	5
100	NL	2	15	11	5	3	2	2	1	1	1	3	2	3	5	4	3	2	2	3	3	1	2	2	2	3	5	5	5	1	4	3	2	2	3	3	5	4	3	3	3	3	5	4	1	3	3	2	4
100	NL	2	14	3	5	3	1	2	1	1	1	4	3	4	4	4	4	2	1	4	4	1	3	4	4	4	5	5	5	5	5	5	3	4	4	5	5	5	4	5	5	4	1	1	2	4	2	1	4
100	NL	2	13	11	4	6	1	1	1	1	1	2	2	2	2	2	2	1	1	4	2	1	1	2	2	1	5	2	5	1	2	4	1	2	1	3	3	5	3	2	3	3	2	1	1	4	4	3	4
100	NL	1	12	10	3	6	1	2	1	1	1	2	1	5	5	5	3	2	1	3	5	4	5	4	4	2	5	5	5	3	3	4	4	4	2	5	5	5	5	4	5	4	3	1	3	5	1	3	4
100	NL	2	13	3	4	3	1	1	1	1	1	5	2	5	5	5	4	3	1	5	3	1	3	3	4	1	5	5	5	1	3	4	2	4	2	5	5	5	3	4	4	4	2	4	2	5	3	4	5
100	NL	1	14	3	5	2	2	2	1	1	1	5	2	4	5	5	4	3	2	4	3	2	2	4	4	3	4	5	5	5	5	5	3	2	3	5	5	5	5	5	5	5	4	2	3	4	3	2	5
100	NL	1	14	3	4	3	2	1	1	1	1	3	1	4	5	4	3	3	2	4	4	1	2	2	4	2	4	5	4	2	4	3	2	3	2	4	5	4	3	3	4	5	1	3	4	2	2	1	4
100	NL	1	13	3	3	3	1	2	1	1	1	4	2	5	5	5	4	3	3	4	4	1	3	2	4	2	5	5	5	4	4	4	2	3	2	5	4	5	5	5	5	3	2	1	1	4	4	3	4
100	NL	2	14	3	5	3	1	2	1	1	1	5	1	5	5	3	3	3	2	5	4	1	3	4	4	2	5	5	5	3	3	3	3	3	2	4	5	5	4	4	5	5	5	5	1	5	4	2	5
100	NL	2	13	11	3	8	1	2	1	1	1	4	2	4	5	4	4	3	3	4	3	1	1	2	4	1	4	5	5	1	3	3	2	4	1	4	5	5	1	3	4	4	3	5	1	5	5	1	5
100	NL	2	12	3	3	3	2	2	1	1	1	4	2	5	5	5	3	3	2	5	4	1	2	3	3	2	4	5	4	3	3	4	3	3	2	5	5	5	3	3	4	5	4	3	2	2	2	3	5
100	NL	2	12	3	4	2	1	2	1	1	1	3	2	4	5	5	3	3	2	5	5	1	1	3	3	3	4	5	5	2	4	4	2	2	2	4	5	5	5	5	5	4	3	1	1	5	5	2	5
100	NL	2	15	3	4	2	1	2	1	1	1	4	3	5	5	4	4	4	2	4	4	2	2	4	4	3	5	5	5	4	5	5	2	3	3	5	4	5	4	5	5	4	2	5	1	5	4	1	5
100	NL	2	12	2	2	4	1	1	1	1	1	3	1	5	5	4	4	4	2	4	3	2	2	2	4	2	4	4	5	3	3	4	2	3	2	5	5	5	4	3	5	5	2	4	1	5	5	5	5
100	NL	1	13	3	5	3	1	2	1	1	1	4	2	4	5	4	4	3	1	4	4	1	2	2	3	2	4	3	1	1	3	3	2	2	2	4	3	5	2	4	3	4	3	4	1	3	2	2	4
100	NL	1	13	3	3	2	1	2	1	1	1	4	2	5	5	5	3	3	2	3	4	2	1	3	4	2	4	5	5	3	4	5	3	3	2	4	5	5	3	4	5	4	4	4	1	3	3	3	4
100	NL	2	14	3	5	2	1	2	1	1	1	2	2	4	5	3	3	2	2	4	4	2	3	2	2	1	4	4	5	2	3	4	2	2	2	4	3	4	2	4	4	4	4	4	1	3	3	4	4
100	NL	2	13	3	3	3	1	2	1	1	1	5	1	5	5	4	4	3	1	5	3	2	3	3	4	1	5	5	5	2	3	4	2	3	1	5	5	5	4	5	5	2	5	1	4	4	3	2	4
100	NL	2	13	3	4	3	1	2	1	1	1	3	1	4	5	3	3	3	2	5	3	1	2	2	4	2	5	5	5	3	3	4	2	4	1	4	5	5	3	3	5	5	5	5	2	4	4	4	5
100	NL	1	12	3	3	3	1	2	1	1	1	5	1	3	5	5	2	2	1	5	4	1	1	2	2	1	3	3	4	1	3	3	1	1	1	4	3	5	1	2	4	5	5	1	4	4	4	2	4
100	NL	1	12	3	3	3	1	2	1	1	1	4	1	3	5	5	2	2	1	5	3	1	1	1	3	1	4	5	4	1	2	5	1	2	1	4	3	5	2	1	5	4	1	3	1	5	1	1	5
100	NL	2	13	11	4	1	1	2	1	1	1	4	1	5	5	4	3	3	1	5	3	1	3	3	4	1	5	5	5	3	2	4	2	4	1	3	4	5	2	3	1	5	2	5	1	5	2	4	5
100	NL	2	14	3	4	3	1	2	1	1	1	4	2	4	5	3	4	2	1	5	5	1	3	4	4	3	5	5	5	2	3	3	3	3	2	4	5	5	3	3	4	4	3	2	4	4	4	2	5
100	NL	1	13	3	5	2	1	2	1	1	1	3	2	3	5	4	3	3	2	4	4	2	3	3	3	3	4	5	5	2	3	5	3	2	4	4	5	5	5	4	5	5	3	2	1	4	3	1	5
100	NL	1	14	11	4	2	1	2	1	1	1	3	2	4	4	4	4	2	3	3	4	3	3	3	4	3	5	5	5	4	5	5	2	3	2	5	5	5	4	5	5	4	4	4	4	4	3	4	4
100	NL	1	12	3	3	2	1	2	1	2	1	4	2	3	5	4	2	2	2	4	4	2	2	3	2	3	4	4	5	2	4	4	2	3	3	4	4	4	2	4	4	4	4	4	2	4	3	1	4
100	NL	1	12	3	3	3	1	2	1	2	1	2	1	4	5	3	1	1	2	4	5	1	5	1	3	1	5	5	5	1	4	4	4	4	1	5	5	5	1	4	3	5	3	1	4	4	4	4	5
100	NL	1	13	11	4	6	1	1	1	1	1	4	2	5	5	3	3	2	1	4	4	1	2	2	3	1	4	4	5	2	2	3	2	2	2	4	4	5	2	3	5	5	3	3	1	3	2	2	4
100	NL	1	15	3	5	3	1	2	1	1	1	4	2	4	5	5	2	3	1	4	3	1	3	2	3	3	4	2	5	2	3	4	2	2	2	4	4	5	3	3	5	4	3	4	1	2	2	2	5
100	NL	2	12	11	3	8	1	2	1	2	1	3	1	4	4	4	4	4	1	4	2	1	1	3	4	2	5	5	5	4	5	5	4	4	1	5	5	5	5	5	5	5	5	3	1	1	1	3	5
100	NL	2	15	11	5	1	1	2	1	1	1	3	2	5	5	3	3	3	2	3	4	1	3	4	4	4	5	4	5	4	3	5	2	3	1	5	5	5	5	5	5	5	3	3	1	5	5	4	4
100	NL	1	13	7	3	6	1	2	1	1	1	4	1	5	5	5	4	3	2	5	4	2	2	4	2	4	4	5	5	2	3	4	3	2	2	5	5	5	4	4	5	4	3	1	3	3	2	2	5
100	NL	2	15	11	5	1	1	2	1	1	1	3	1	5	5	4	3	3	1	5	2	1	3	2	3	1	5	5	5	2	2	3	1	4	1	5	5	5	5	5	5	5	3	3	3	5	5	3	5
100	NL	2	16	11	5	3	1	2	1	1	1	5	2	4	5	5	4	2	1	5	4	1	3	3	3	3	5	4	5	2	3	5	2	3	1	5	4	5	4	5	5	3	3	5	1	3	2	2	3
100	NL	1	12	3	3	3	1	2	1	1	1	5	2	5	5	4	3	2	1	2	3	1	2	3	3	2	5	5	5	1	3	5	2	3	2	4	3	5	2	3	5	3	1	4	1	5	3	1	3
100	NL	2	14	11	5	3	1	2	1	1	1	5	1	5	4	4	3	3	1	5	4	1	1	4	4	4	5	5	5	1	3	5	3	3	2	5	5	5	2	5	5	4	2	3	1	4	1	1	4
100	NL	1	14	3	5	3	1	1	1	1	1	4	1	4	5	4	3	2	1	5	3	1	2	2	4	1	4	5	5	2	4	5	2	3	1	4	5	5	2	4	5	5	4	3	1	5	1	3	4
100	NL	1	13	3	4	3	1	2	1	1	1	4	2	5	5	4	3	3	2	4	4	2	1	2	3	1	4	5	5	3	5	3	1	3	1	4	5	5	2	5	3	3	1	1	2	3	2	2	3
100	NL	2	15	11	5	3	1	2	1	1	1	4	2	4	5	4	4	2	4	5	5	2	3	2	4	2	5	5	5	2	1	3	2	3	1	4	5	5	3	3	3	3	5	4	1	4	4	2	4
100	NL	1	13	3	3	3	1	2	1	1	1	4	1	3	5	5	3	1	1	5	3	1	1	2	2	2	5	5	5	5	4	4	2	4	1	5	5	5	2	2	5	5	5	5	1	5	5	2	5
100	NL	2	13	3	3	3	1	2	1	1	1	4	1	2	5	3	2	2	2	4	4	3	4	3	2	2	3	4	5	1	1	4	1	2	1	2	3	4	1	1	4	3	2	5	1	1	2	1	4
100	NL	1	15	10	5	2	2	2	1	1	1	4	1	4	5	5	1	1	1	3	2	1	1	3	3	3	4	5	5	3	1	2	2	2	3	4	4	5	2	2	5	4	4	5	1	3	2	1	4
100	NL	1	12	3	3	3	1	2	1	1	1	4	1	4	5	5	3	2	2	5	4	1	2	2	3	2	5	3	4	2	4	4	2	2	1	4	2	4	1	4	3	5	1	1	3	2	2	1	4
100	NL	2	15	3	5	3	1	2	1	1	1	4	2	4	5	4	3	3	2	5	3	2	3	4	4	4	4	4	4	1	4	4	3	3	3	5	5	5	5	5	5	1	3	2	4	4	1	1	4
100	NL	1	11	2	1	4	1	2	1	1	2	3	1	5	5	5	1	1	2	3	4	2	1	2	2	1	5	5	5	1	3	5	2	3	1	5	5	5	3	3	5	5	5	5	1	5	5	5	5
100	NL	1	12	3	3	2	1	1	1	2	1	4	1	4	5	5	3	3	4	5	4	1	1	3	4	1	5	4	5	1	3	2	1	2	3	1	2	3	4	5	4	5	4	5	4	3	4	3	5
100	NL	2	14	3	4	3	1	1	1	1	2	4	1	2	5	3	3	3	1	5	4	1	3	3	3	2	5	5	5	2	3	4	2	3	3	3	5	5	2	2	5	2	4	4	2	5	3	1	3
100	NL	3	14	3	5	3	1	2	1	1	1	5	2	5	5	3	3	3	2	5	3	2	4	1	3	1	5	5	5	3	5	5	1	4	1	5	5	5	3	3	5	4	3	5	3	5	5	3	4
100	NL	1	14	3	5	3	1	2	1	1	1	4	1	2	5	4	3	1	1	5	4	1	2	4	4	1	5	5	5	2	3	4	4	4	1	5	5	5	2	3	4	4	4	4	1	3	2	1	5
100	NL	1	15	3	5	2	1	2	1	1	1	4	3	4	5	5	3	4	3	3	4	2	2	3	3	3	5	4	5	3	3	4	2	3	3	4	4	5	3	4	4	4	2	3	1	2	2	2	5
100	NL	2	14	11	4	1	1	2	1	1	1	1	3	5	5	4	3	2	1	4	4	5	5	3	1	2	3	5	5	1	1	5	4	4	4	4	4	4	1	4	4	5	5	1	5	4	2	1	5
100	NL	1	12	3	3	3	2	2	1	1	1	3	1	4	5	5	3	2	2	5	4	1	2	2	4	1	5	5	5	2	3	5	3	4	2	5	4	5	2	4	5	3	4	4	1	4	4	2	4
100	NL	2	14	3	5	2	1	2	1	1	1	4	1	4	5	2	3	3	2	4	4	1	4	2	3	2	5	4	5	4	3	4	2	2	2	4	5	3	3	2	5	4	4	2	5	5	4	4	4
100	NL	1	14	3	5	2	1	2	1	2	1	3	1	5	5	3	3	3	2	3	4	2	2	4	4	3	5	5	5	5	4	5	4	4	4	5	5	5	5	5	5	5	3	5	2	4	4	1	5
100	NL	1	13	3	4	3	1	2	1	1	1	3	1	4	5	4	3	3	2	5	3	1	3	4	3	2	5	4	4	1	5	5	3	2	1	5	4	4	1	3	5	5	2	4	1	5	3	2	5
100	NL	2	12	3	3	3	1	2	1	1	1	3	1	5	5	4	4	3	2	4	3	1	3	2	2	2	4	4	5	5	2	4	2	3	1	5	4	5	5	2	4	5	2	4	1	5	3	3	5
100	NL	1	14	3	5	3	2	1	1	2	1	4	2	4	5	4	4	3	1	4	3	2	1	3	4	2	5	5	5	4	3	5	3	3	2	5	5	5	5	5	5	5	5	5	3	4	2	1	5
100	NL	1	14	3	5	3	1	2	1	1	1	3	1	3	5	5	3	2	2	5	4	1	2	4	2	1	4	4	3	2	4	4	3	2	1	5	5	5	5	5	5	3	3	2	4	5	1	1	2
100	NL	2	12	3	3	3	2	2	1	1	1	5	2	5	5	2	4	4	1	5	3	1	2	3	3	4	5	4	5	1	2	3	3	3	4	4	4	5	2	3	4	2	4	4	3	4	4	4	3
100	NL	2	12	3	3	2	1	2	1	1	1	3	1	5	5	4	4	4	2	4	4	2	3	3	4	3	5	5	5	2	4	5	3	2	2	4	5	5	2	4	5	5	4	4	3	3	3	3	5
100	NL	1	12	3	3	3	2	2	1	1	1	3	2	3	5	4	2	2	1	3	2	1	1	2	3	1	4	4	4	2	3	3	2	3	2	4	3	4	2	3	5	3	1	5	1	4	3	2	4
100	NL	1	13	3	4	3	1	2	1	1	1	3	1	4	5	3	4	3	2	4	5	2	3	4	4	4	5	5	5	3	4	5	4	2	4	5	5	5	4	5	5	3	4	4	2	4	2	3	4
100	NL	2	12	3	3	2	1	2	1	1	1	4	2	3	5	5	4	3	1	5	4	1	1	4	2	3	5	5	5	2	5	4	3	2	2	5	5	5	2	5	4	5	2	4	2	5	3	3	4
100	NL	2	12	3	3	2	1	2	1	1	1	3	1	4	5	4	2	2	2	4	4	2	3	3	2	3	4	4	5	2	4	3	3	1	3	4	3	5	1	3	3	3	4	4	1	2	2	3	4
100	NL	2	14	3	5	3	1	2	1	1	1	3	2	4	5	3	3	2	3	4	3	2	3	3	3	1	4	5	5	4	4	4	1	3	1	4	4	4	4	3	4	4	3	3	1	1	2	1	5
100	NL	2	14	3	5	3	2	2	1	2	1	3	2	4	5	4	4	4	1	5	4	1	3	2	4	2	5	5	5	3	3	5	3	2	4	5	5	5	5	5	5	4	3	5	1	5	4	2	5
100	NL	1	10	2	1	4	1	2	1	1	2	3	2	5	5	5	4	3	1	3	3	1	1	2	4	2	5	5	5	3	4	5	3	3	2	5	5	5	5	5	5	5	4	4	2	5	3	2	5
100	NL	1	15	3	4	3	2	2	1	1	1	4	1	4	5	3	2	2	1	5	2	1	3	4	4	2	5	5	5	3	4	2	3	3	2	5	5	5	2	3	4	2	1	1	1	3	2	2	3
100	NL	2	11	2	2	4	1	1	1	1	1	4	2	3	5	5	3	3	2	4	4	1	1	2	3	2	5	5	5	1	3	4	2	3	1	5	5	5	2	4	5	4	2	1	1	4	3	3	4
100	NL	1	11	2	2	4	2	1	1	1	1	4	1	4	5	3	3	3	1	2	2	1	1	3	3	4	5	5	4	3	4	5	3	4	4	5	5	4	3	3	5	2	5	3	1	5	2	4	4
100	NL	1	14	3	5	3	2	2	1	1	1	4	2	5	5	5	4	3	1	3	4	1	1	3	4	2	3	5	5	5	4	4	3	4	3	4	4	5	5	3	5	3	1	4	1	1	2	2	4
100	NL	2	13	3	4	3	1	1	1	1	1	4	1	4	5	3	3	3	1	5	4	1	3	3	2	4	4	3	5	4	4	4	3	3	4	4	5	5	5	5	5	4	2	4	1	5	4	1	5
100	NL	1	13	3	3	3	1	2	1	1	1	4	2	4	5	2	3	2	2	3	2	1	2	3	3	2	5	4	5	2	3	5	3	3	2	4	4	4	3	3	5	4	3	4	3	4	3	4	4
100	NL	2	13	3	3	2	1	2	1	1	2	3	3	4	5	3	3	3	2	3	4	3	3	3	4	4	4	5	5	1	3	4	2	4	3	5	5	5	5	5	5	4	5	3	1	4	4	2	5
100	NL	2	13	3	4	3	2	1	1	1	1	3	2	4	5	4	3	2	1	5	4	3	3	2	3	2	4	4	5	2	4	4	2	3	2	4	4	5	2	3	3	4	3	4	2	4	4	2	4
100	NL	2	12	3	3	3	1	2	1	1	1	3	2	4	5	5	3	3	2	4	3	1	1	2	1	2	5	5	4	1	3	4	3	2	1	5	5	5	4	4	5	4	4	3	1	5	5	3	4
100	NL	1	12	3	3	3	2	2	1	1	1	3	2	4	5	3	4	3	2	2	3	1	1	3	3	2	3	4	4	3	4	5	3	3	4	5	5	5	5	5	5	5	4	5	3	4	3	4	3
100	NL	1	15	3	5	3	2	2	1	1	1	3	2	5	5	5	4	4	3	4	5	4	4	3	4	3	5	5	5	3	4	5	3	4	4	5	5	5	1	5	5	5	5	5	5	5	5	4	5
100	NL	2	13	3	4	3	2	1	1	1	1	5	3	4	5	5	3	3	2	4	4	1	1	4	4	2	4	5	5	2	2	4	2	2	2	5	5	4	5	5	5	4	3	3	1	5	4	3	5
100	NL	1	14	3	5	3	1	1	1	1	1	4	2	3	5	4	3	2	2	3	4	1	1	2	2	2	4	4	4	3	3	4	2	2	2	5	4	4	3	3	4	5	4	4	2	4	3	3	5
100	NL	2	13	3	4	3	2	2	1	2	1	4	2	5	5	4	4	4	3	5	3	2	3	2	3	2	5	5	5	2	2	4	3	3	1	4	5	5	3	3	4	2	3	4	1	3	2	2	4
100	NL	2	12	3	3	3	2	2	1	2	1	4	1	3	5	3	3	2	2	3	5	1	3	2	3	1	4	4	5	2	3	3	3	2	2	5	4	5	2	3	3	1	3	1	2	3	1	1	2
100	NL	2	15	3	5	3	1	2	1	1	1	4	3	3	5	4	1	1	3	4	4	2	3	2	2	3	4	4	5	2	1	5	2	3	3	4	4	5	1	3	5	4	3	4	1	4	4	2	4
100	NL	2	14	3	4	3	1	2	1	1	1	3	3	5	5	4	3	4	1	4	3	2	3	2	4	3	5	4	5	3	4	5	2	2	2	5	4	5	2	4	5	4	4	4	1	3	1	1	5
100	NL	2	12	3	3	3	1	2	1	1	1	4	2	4	5	3	3	3	2	4	3	1	3	1	4	2	5	5	5	1	5	5	1	4	2	5	5	5	1	5	5	5	4	4	1	5	3	2	4
100	NL	2	15	3	5	3	1	2	1	1	1	5	2	2	5	4	2	2	1	5	4	1	2	3	3	2	4	4	5	3	2	4	3	2	1	2	2	4	2	2	5	5	5	5	1	2	1	1	5
100	NL	2	14	3	5	3	1	2	1	1	1	3	1	4	5	4	3	3	3	5	4	2	4	3	2	1	4	4	5	1	2	3	2	3	2	5	5	5	3	4	4	4	4	5	2	5	3	2	4
100	NL	1	14	10	5	3	1	2	1	1	1	4	3	3	5	5	3	2	2	4	4	1	2	3	3	2	4	5	4	4	5	3	3	4	2	4	5	3	3	5	3	4	3	2	4	3	3	3	4
100	NL	1	13	10	3	6	1	2	1	1	1	3	1	3	5	5	3	2	2	4	3	1	2	4	3	2	5	4	5	3	1	5	3	4	2	5	4	5	1	1	5	4	5	5	1	4	1	3	4
100	NL	1	13	11	4	6	2	1	1	1	1	4	2	3	5	5	3	2	2	5	5	2	2	4	4	2	5	3	5	2	4	3	2	2	1	5	4	5	2	4	5	3	5	2	2	3	3	3	4
100	NL	1	13	10	4	3	1	1	1	1	1	5	3	5	5	5	5	5	2	5	5	1	2	3	4	4	5	5	5	2	3	4	3	4	2	5	5	5	4	5	5	4	3	1	3	4	4	4	4
100	NL	3	15	7	5	2	1	2	1	1	1	5	3	5	5	4	4	3	2	4	3	1	3	4	4	3	5	5	4	3	4	5	3	2	2	5	5	4	3	4	5	4	3	2	2	4	2	3	4
100	NL	1	13	11	4	6	1	1	1	1	1	3	2	4	5	3	2	1	1	4	3	1	2	3	3	3	5	4	5	1	3	5	3	3	2	5	5	5	2	5	5	2	4	3	2	3	3	2	4
100	NL	1	13	7	4	6	1	2	1	1	1	4	2	4	5	5	4	3	1	3	4	1	1	2	3	2	5	5	5	2	4	5	1	4	2	5	5	5	2	4	5	4	3	4	1	5	3	4	3
100	NL	2	15	7	5	2	2	1	1	1	1	3	1	3	5	5	3	2	1	4	3	1	2	2	4	2	5	5	5	3	3	5	2	2	1	5	4	5	3	5	5	3	4	1	1	5	1	1	4
100	NL	1	13	10	4	3	1	1	1	1	1	5	2	5	5	5	4	3	2	5	3	1	2	2	4	2	5	5	5	5	5	5	2	4	2	5	5	5	5	5	5	4	2	1	4	3	2	2	5
100	NL	2	13	8	3	6	1	2	1	1	1	4	3	5	5	5	3	3	1	4	3	3	3	3	4	3	5	5	5	2	1	5	3	3	3	4	5	5	4	3	5	5	5	5	3	5	5	5	5
100	NL	2	14	8	4	3	1	2	1	1	1	4	1	3	5	3	3	3	3	4	4	2	4	3	3	2	4	4	5	3	4	4	2	2	2	4	5	5	3	5	5	1	2	5	1	5	3	1	4
100	NL	2	14	7	5	3	1	2	1	1	1	4	1	5	5	4	4	4	2	3	4	2	3	2	4	3	5	5	5	2	3	5	2	3	2	3	5	5	1	2	5	4	1	4	4	5	2	2	4
100	NL	2	13	3	3	3	1	1	1	1	1	4	1	4	5	4	2	2	1	5	2	1	3	3	4	1	4	5	5	2	5	5	2	3	1	5	5	4	3	5	5	5	1	4	2	4	3	4	5
100	NL	2	14	3	5	2	1	2	1	1	1	4	3	5	5	3	3	3	2	5	5	2	4	3	4	2	5	5	5	1	4	5	2	3	3	5	5	5	1	5	5	5	5	5	2	5	4	2	5
100	NL	1	12	3	3	3	1	2	1	1	1	4	1	3	5	4	3	4	2	5	4	1	3	4	4	1	3	5	4	2	3	5	3	4	1	3	5	5	5	5	5	4	5	4	2	4	5	5	4
100	NL	2	14	3	5	3	1	2	1	1	1	4	2	3	5	3	3	2	2	4	3	2	2	3	3	2	4	4	3	2	3	3	2	3	2	4	5	5	2	3	4	3	2	1	3	2	2	2	4
100	NL	1	15	3	5	3	1	2	1	1	1	5	1	2	5	3	3	1	1	4	4	1	3	2	3	2	1	4	4	1	2	3	2	1	2	2	5	5	2	4	5	4	4	2	1	5	4	2	5
100	NL	1	13	3	4	3	1	1	1	1	1	4	2	3	5	4	4	3	1	5	4	2	3	3	3	2	4	4	5	2	4	3	3	2	2	5	5	5	3	4	5	4	2	3	1	4	3	2	4
100	NL	1	14	3	5	3	1	2	1	1	1	4	2	4	5	4	3	2	3	5	4	2	2	2	4	2	5	5	5	2	2	5	2	3	2	4	5	5	2	2	5	4	3	2	1	4	2	1	4
100	NL	2	13	3	4	3	1	1	1	1	1	4	2	3	5	4	3	3	2	4	4	1	2	3	2	1	5	4	4	2	2	3	2	2	1	5	5	4	2	2	4	4	3	2	1	5	2	2	4
100	NL	1	13	3	4	2	1	2	1	1	1	3	1	5	5	3	3	3	2	4	3	1	3	2	3	2	4	4	5	4	4	5	3	4	2	4	5	5	4	4	5	5	3	4	1	3	2	3	5
100	NL	2	14	3	5	3	1	2	1	1	1	5	3	4	5	4	4	3	3	5	5	1	2	2	4	2	5	5	5	1	3	4	2	4	3	5	5	5	2	2	5	4	3	4	1	5	4	2	4
100	NL	1	12	3	3	2	2	2	1	1	1	5	2	5	5	5	4	4	3	5	4	3	1	4	4	1	4	4	5	1	4	5	3	3	1	4	4	4	2	5	5	5	5	1	1	3	3	3	5
100	NL	2	15	3	5	3	1	2	1	1	1	4	2	5	5	3	4	3	1	4	4	1	3	3	4	2	4	4	5	2	2	4	3	3	2	4	5	5	3	3	5	4	3	4	2	3	3	1	5
100	NL	2	12	2	2	4	1	1	1	1	1	3	2	4	5	4	3	3	2	4	5	2	2	3	2	2	5	5	5	3	4	4	2	2	2	5	5	5	4	5	5	5	4	3	4	3	2	3	4
100	NL	1	13	3	4	3	1	2	1	1	1	3	2	2	5	2	2	2	2	5	4	1	2	3	2	3	4	4	4	2	2	2	1	1	1	4	3	4	2	2	4	4	1	2	3	3	1	1	3
100	NL	2	15	3	5	2	2	2	1	1	1	4	2	4	5	4	4	4	2	5	3	1	3	3	3	2	5	5	5	1	1	5	2	2	1	5	5	5	1	2	5	3	3	5	1	5	3	3	4
100	NL	2	14	3	5	3	2	2	1	1	1	4	2	3	4	4	3	3	2	4	3	1	3	3	3	2	4	4	5	2	3	4	3	3	2	4	4	5	3	3	4	4	4	3	3	3	4	2	4
100	NL	2	13	3	5	3	2	2	1	1	1	4	3	5	5	5	5	4	1	5	5	1	2	1	4	3	4	5	5	4	5	5	1	4	1	5	5	5	5	5	5	4	5	5	3	5	5	3	5
100	NL	1	13	3	4	3	2	1	1	1	1	4	1	3	5	5	3	1	2	4	4	2	1	4	3	2	4	4	4	2	3	4	2	2	2	4	4	4	2	3	4	4	2	2	3	3	3	3	4
100	NL	2	13	3	4	3	1	1	1	1	1	5	2	3	5	3	3	3	3	4	4	2	3	3	3	2	4	4	5	2	3	4	2	2	2	4	4	5	2	3	4	5	3	4	1	4	4	3	4
100	NL	2	14	3	5	3	1	2	1	1	1	3	1	4	5	4	4	3	1	4	4	1	3	2	4	1	4	5	5	2	3	4	1	3	1	4	4	5	3	3	5	4	3	5	1	3	2	1	4
100	NL	2	14	8	5	3	1	1	1	1	1	4	2	4	5	5	3	2	2	3	4	2	2	4	3	2	5	5	4	2	4	4	3	3	3	5	4	5	2	3	4	5	4	3	4	3	2	4	4
100	NL	1	13	3	4	3	1	1	1	1	1	4	2	2	5	2	3	3	1	5	3	2	4	4	3	3	3	5	4	1	1	4	2	2	1	4	5	5	1	2	5	5	1	2	4	2	2	2	3
100	NL	2	10	2	1	4	1	2	1	1	1	4	2	5	5	3	4	4	1	3	3	1	3	3	3	2	5	5	5	4	3	4	3	3	2	5	5	5	3	3	4	5	1	1	1	5	3	4	5
100	NL	2	15	3	5	3	2	1	1	1	1	4	2	4	5	2	2	2	3	4	4	3	2	2	2	2	5	4	5	2	3	4	2	3	1	3	5	5	3	4	5	3	3	4	1	4	4	4	4
100	NL	1	14	11	4	1	1	2	1	1	1	5	2	5	5	4	4	3	1	4	3	3	2	2	3	1	5	4	5	4	4	4	3	4	2	5	4	5	1	1	5	5	3	2	1	4	4	2	4
100	NL	1	15	10	5	2	2	2	1	1	1	5	3	5	5	5	5	4	3	3	5	5	2	3	4	4	5	5	5	1	4	5	4	4	3	5	5	5	1	4	5	4	4	4	1	5	3	3	4
100	NL	3	13	11	4	8	2	2	1	1	1	2	2	5	5	3	3	2	3	5	3	1	2	3	4	3	5	5	5	3	3	4	3	3	3	4	4	5	1	1	5	1	5	2	1	4	1	1	4
100	NL	1	15	10	5	2	1	2	1	1	1	4	1	5	4	4	3	2	2	5	3	1	2	3	3	1	5	4	5	1	4	4	3	4	1	5	3	3	1	4	5	4	3	3	1	5	4	3	4
100	NL	2	14	3	4	3	1	1	1	1	1	4	1	3	5	4	4	3	1	5	3	1	2	3	3	2	4	4	4	1	2	3	3	3	2	5	5	5	2	3	3	3	3	3	3	3	3	3	4
100	NL	1	11	2	1	4	1	1	1	1	1	4	3	4	5	5	4	3	3	4	4	2	2	3	3	3	5	5	5	5	4	5	4	3	4	5	5	5	4	5	5	5	3	5	5	4	1	4	5
100	NL	2	13	11	4	2	1	2	1	1	1	3	1	4	5	3	3	2	2	4	3	2	3	3	4	2	4	4	5	3	3	4	2	2	1	4	4	4	2	2	4	3	3	3	2	3	3	3	4
100	NL	1	11	2	1	4	1	1	1	1	1	4	1	3	5	3	2	2	1	5	4	1	3	3	4	2	5	5	5	2	4	5	3	4	2	5	4	5	3	4	5	5	3	2	4	3	3	4	5
100	NL	2	12	3	3	3	1	2	1	1	1	4	1	3	5	4	3	2	1	5	4	1	2	1	4	1	5	5	4	1	3	4	2	3	1	5	4	3	1	2	4	5	3	2	5	4	3	4	5
100	NL	1	13	3	3	3	1	2	1	1	1	4	2	5	5	4	3	1	3	2	4	5	3	4	4	4	5	5	5	2	5	5	4	4	4	5	5	5	2	5	5	5	5	5	5	5	5	5	3
100	NL	1	13	10	4	6	2	2	1	1	1	3	1	4	5	4	2	2	2	5	4	1	1	4	3	1	4	5	3	2	2	5	4	3	1	4	5	3	1	2	5	4	1	4	1	3	5	2	4
100	NL	2	15	11	5	1	2	2	1	1	1	3	1	5	5	4	3	3	2	3	4	1	3	3	4	3	5	5	5	2	5	5	2	3	2	5	5	5	2	5	5	5	5	5	1	4	3	3	4
100	NL	2	15	3	5	2	2	2	1	1	1	4	2	3	5	3	3	3	1	5	4	3	4	3	3	1	4	5	5	2	4	5	2	3	1	3	5	5	3	4	5	4	2	4	1	3	3	3	4
100	NL	2	14	3	4	2	1	2	1	1	1	4	1	5	5	3	3	3	1	3	2	1	2	3	3	3	4	3	5	2	3	3	2	2	2	4	5	5	2	3	3	3	2	3	1	4	3	1	4
100	NL	2	13	11	4	8	1	2	1	1	1	4	3	5	5	4	3	3	2	3	1	1	1	3	4	2	5	5	5	3	4	5	2	4	2	5	4	5	4	4	5	5	4	4	3	4	3	4	5
100	NL	2	14	3	5	3	1	2	1	1	1	4	1	2	5	3	2	2	1	5	4	1	3	4	4	2	5	5	5	1	3	5	4	4	1	4	5	5	2	4	5	5	4	2	1	2	2	2	5
100	NL	1	14	3	5	3	2	1	1	1	1	2	1	2	4	3	1	1	2	4	3	2	2	3	3	3	4	5	5	3	2	5	3	3	2	3	2	4	1	1	4	1	2	1	1	4	2	2	4
100	NL	2	15	11	4	1	2	2	1	1	1	3	2	5	5	4	4	3	1	3	2	2	3	3	2	3	5	5	5	3	2	5	4	4	3	4	5	5	4	3	5	4	4	5	1	4	3	2	5
100	NL	2	14	11	5	2	2	1	1	1	1	3	1	5	5	4	3	3	1	5	3	1	2	2	3	2	5	4	5	3	3	4	2	2	1	4	4	5	4	3	5	4	5	5	1	4	4	2	4
100	NL	2	15	11	5	1	1	2	1	1	1	3	2	4	5	3	4	3	2	5	4	3	4	2	4	1	5	4	5	2	4	4	1	3	1	4	4	5	3	4	5	3	4	4	1	1	3	3	4
100	NL	2	14	11	5	1	1	2	1	1	1	3	2	4	5	3	3	2	2	4	4	2	3	4	4	2	5	5	5	4	5	4	3	4	3	5	5	5	5	5	5	3	5	4	2	2	2	1	3
100	NL	1	14	11	5	3	1	2	1	1	1	2	1	3	5	3	3	2	2	3	3	1	1	2	4	1	5	5	5	1	5	5	2	2	2	5	5	5	1	5	5	5	1	1	1	5	3	1	5
100	NL	1	15	11	4	1	2	2	1	1	1	4	2	5	4	3	3	3	2	3	5	2	1	3	4	3	5	4	5	4	3	5	3	4	3	5	4	5	4	3	5	2	4	4	2	3	3	1	3
100	NL	2	15	11	5	1	2	2	1	1	1	3	3	4	5	2	4	4	2	4	1	2	3	2	4	1	5	5	5	4	3	5	4	4	2	5	5	5	2	2	5	4	3	5	1	4	4	4	5
100	NL	1	12	11	3	8	1	1	1	1	1	3	2	4	5	5	3	3	4	5	4	3	1	3	3	3	5	5	5	2	4	5	3	3	2	5	5	5	5	5	5	5	1	1	1	1	1	1	4
100	NL	1	13	11	3	6	1	2	1	2	1	3	2	4	5	3	3	2	2	4	3	2	3	3	3	2	4	4	5	2	4	4	3	3	2	4	4	5	3	4	4	4	3	3	4	2	1	2	4
100	NL	2	14	11	5	1	2	2	1	1	1	4	2	5	5	4	5	4	1	4	3	1	1	3	4	3	5	3	5	4	3	5	2	3	3	5	5	5	5	4	5	4	3	5	1	4	2	1	4
100	NL	1	13	3	3	3	1	2	1	1	1	4	1	4	5	3	3	2	1	4	4	1	1	4	3	4	5	5	5	2	4	5	2	2	3	5	5	5	3	4	5	1	5	1	1	5	1	3	1
100	NL	2	12	10	3	6	2	2	1	2	1	4	2	5	5	4	4	4	1	3	4	1	2	4	3	4	5	4	5	3	4	4	3	2	4	5	5	5	4	5	4	4	5	5	2	3	3	3	3
100	NL	2	16	10	5	2	2	2	1	1	1	3	1	5	5	4	4	4	2	4	2	4	3	4	4	4	5	5	5	2	5	5	3	3	4	4	5	5	3	5	5	5	3	3	3	4	3	4	5
100	NL	2	13	11	4	2	2	2	1	1	1	3	1	5	5	2	1	1	3	5	1	1	3	3	3	3	5	5	5	1	5	5	4	4	4	5	5	5	3	2	5	5	5	2	1	5	2	1	3
100	NL	1	12	10	3	6	2	2	1	1	1	4	3	5	5	4	4	4	3	3	3	2	1	3	3	3	5	5	5	4	4	5	4	3	4	5	5	5	4	5	5	5	1	4	1	5	4	1	5
100	NL	1	15	3	5	3	1	2	1	1	1	3	3	5	5	4	4	4	1	3	4	2	2	4	4	4	4	5	5	3	4	5	3	2	2	4	5	5	3	4	5	3	3	5	1	3	4	2	4
100	NL	2	12	3	3	3	1	1	1	1	2	3	2	4	5	4	4	3	2	4	5	2	2	4	3	3	4	5	4	1	3	5	2	3	3	4	4	4	2	3	4	5	1	5	1	4	4	3	5
100	NL	2	14	3	5	3	1	2	1	1	2	3	2	4	5	4	3	2	3	4	3	2	2	3	2	3	3	4	5	3	3	4	3	2	3	3	4	5	4	3	4	4	3	4	2	4	3	3	4
100	NL	1	14	3	5	3	1	2	1	1	1	3	1	4	4	4	3	3	1	5	4	2	3	4	3	2	4	4	5	4	3	4	3	3	2	4	4	4	3	3	4	4	1	5	4	5	2	1	5
100	NL	2	13	11	3	8	2	2	1	1	1	4	2	5	5	4	3	2	1	4	3	2	3	3	4	2	5	4	5	3	5	5	2	3	2	4	4	5	2	5	5	4	3	4	1	4	4	4	4
100	NL	2	13	7	4	6	1	2	1	1	1	4	2	3	5	3	3	1	2	4	4	1	2	2	3	2	4	4	5	1	2	5	2	3	2	5	4	5	3	2	5	3	1	2	1	5	2	3	4
100	NL	2	15	3	5	3	1	2	1	1	1	3	3	4	5	3	3	3	1	5	3	1	2	3	3	2	5	5	5	2	5	4	2	2	1	5	4	5	3	5	5	5	5	1	3	3	1	1	4
100	NL	2	13	3	3	3	1	2	1	1	1	3	1	4	5	2	3	2	2	5	4	3	4	2	2	2	3	4	2	1	3	4	2	2	2	2	4	3	1	3	4	4	5	5	2	5	5	2	3
100	NL	1	14	11	4	8	1	2	1	1	1	3	2	4	4	3	3	3	2	5	4	2	2	2	4	1	5	5	5	4	5	5	2	3	2	5	5	5	4	5	5	4	5	3	1	4	1	1	5
100	NL	2	12	11	4	3	1	1	1	1	1	2	1	3	5	4	3	2	1	5	1	1	3	2	4	1	5	4	5	2	4	3	2	4	1	5	3	5	1	3	4	3	2	2	3	4	5	2	4
100	NL	2	15	3	5	3	1	2	1	1	1	4	2	4	5	2	4	3	1	5	4	2	5	4	4	4	5	5	5	5	5	5	3	3	3	5	5	5	4	4	5	5	3	3	3	5	5	2	5
100	NL	2	12	7	3	2	1	2	1	1	1	4	1	4	4	4	4	3	2	5	4	3	3	2	4	3	5	4	4	3	2	3	2	4	2	5	5	5	3	3	4	5	1	3	2	4	2	2	4
100	NL	1	13	3	4	3	2	1	1	1	1	4	2	4	5	4	3	3	1	4	3	1	2	2	3	1	4	4	5	2	2	4	2	3	1	4	4	5	3	1	5	3	3	4	1	3	2	3	4
100	NL	2	14	7	5	3	1	2	1	1	1	5	3	4	5	5	3	2	2	5	4	1	3	1	4	1	5	5	5	1	4	4	1	2	1	4	5	5	4	4	4	4	3	3	2	4	2	3	4
100	NL	2	13	8	4	2	1	2	1	1	1	3	2	4	5	4	3	3	2	4	4	2	2	2	2	2	5	5	5	2	3	3	2	2	2	4	4	4	3	3	3	4	2	2	2	4	3	3	4
100	NL	2	13	7	4	1	1	2	1	1	1	3	1	5	5	4	2	2	1	3	3	1	2	2	4	2	4	5	5	1	3	3	2	3	2	5	5	5	2	4	3	4	3	4	2	4	4	1	5
100	NL	1	12	11	3	6	1	2	1	2	1	1	1	1	1	1	1	1	1	3	3	2	2	2	2	2	5	5	5	2	4	4	3	3	3	5	5	5	1	5	5	5	1	1	1	1	1	1	5
100	NL	1	15	3	5	3	1	2	1	1	1	4	3	3	5	4	3	3	3	2	2	2	2	3	3	2	4	5	5	1	4	5	3	3	3	4	5	5	1	4	4	4	3	3	4	4	3	3	4
100	NL	1	13	8	4	6	1	2	1	1	1	4	1	4	5	4	2	2	3	2	2	1	4	3	3	3	5	4	5	1	4	5	2	4	2	5	3	5	4	4	5	3	3	5	1	4	5	5	3
100	NL	2	14	3	5	3	1	2	1	1	1	5	2	5	5	2	4	4	3	5	4	2	3	3	3	2	5	5	5	3	3	4	2	3	2	5	5	5	3	3	5	3	5	5	1	5	4	1	5
100	NL	1	12	3	3	3	2	2	1	1	2	4	1	4	5	3	3	3	2	4	2	2	2	3	2	2	4	4	4	4	4	4	2	2	2	4	4	4	4	4	4	3	4	4	1	5	2	1	3
100	NL	2	13	3	4	2	2	2	1	1	1	4	3	3	5	5	3	3	2	5	3	3	3	2	3	2	5	5	5	3	4	4	2	3	2	4	5	4	2	4	4	4	3	5	1	4	3	1	4
100	NL	1	14	11	4	6	2	2	1	1	1	5	1	5	5	5	3	1	1	5	4	1	1	3	4	1	5	5	5	2	4	5	2	4	2	4	5	5	3	4	5	4	4	5	1	4	4	3	4
100	NL	3	12	7	3	6	1	2	1	1	1	5	3	5	5	5	4	4	2	4	4	3	3	3	3	3	5	5	5	4	2	5	4	4	4	5	5	5	5	2	5	3	3	2	1	5	1	2	4
100	NL	2	12	11	3	1	1	2	1	1	1	3	2	4	5	3	3	3	2	3	3	4	2	3	3	2	5	5	5	4	5	5	3	2	2	5	5	5	5	5	5	5	1	4	2	4	1	3	5
100	NL	2	13	10	4	6	2	2	1	1	1	4	3	5	5	5	4	4	2	4	3	1	2	3	4	2	4	5	5	3	2	5	3	4	3	4	5	5	4	3	5	3	5	3	1	2	2	2	4
100	NL	2	12	11	4	6	1	1	1	1	1	4	2	4	5	4	3	3	1	4	4	2	3	2	3	1	5	5	5	2	3	4	3	3	3	5	5	5	3	2	4	4	4	1	1	4	3	3	4
100	NL	2	12	8	3	3	1	2	1	2	1	4	2	5	5	5	2	2	1	4	3	1	1	3	3	3	5	4	5	2	4	4	3	4	3	4	4	5	2	4	5	5	2	4	1	4	3	4	5
100	NL	2	15	7	5	3	1	2	1	1	1	3	2	3	4	3	3	3	3	4	3	2	2	2	3	2	4	5	4	2	4	4	2	3	2	4	4	4	3	4	4	4	4	4	3	5	3	2	3
100	NL	2	15	3	5	3	1	2	1	1	1	4	2	4	5	4	4	3	1	5	3	2	1	2	3	2	5	4	3	1	2	4	2	3	2	4	4	4	2	2	5	4	3	1	4	5	2	5	5
100	NL	1	12	11	3	6	1	1	1	1	1	4	3	5	5	4	2	2	4	4	5	4	5	3	3	4	5	5	5	1	4	5	2	2	3	2	4	5	1	1	5	1	5	4	1	4	1	1	4
100	NL	1	14	7	5	1	1	1	1	1	1	4	2	3	5	5	2	1	1	4	3	1	2	4	4	2	5	5	5	1	3	4	2	3	2	5	5	5	1	3	5	3	3	5	1	3	2	3	4
100	NL	2	13	3	4	3	1	2	1	1	1	5	2	4	5	5	3	3	1	3	4	2	1	4	4	2	5	5	4	5	4	5	2	2	3	5	5	5	4	4	5	5	4	1	5	3	2	2	5
100	NL	2	12	3	3	3	1	2	1	1	2	4	1	4	5	4	3	2	2	4	4	1	3	3	4	2	5	5	5	1	2	4	2	3	1	4	5	5	1	3	4	4	4	5	3	4	3	3	4
100	NL	2	15	7	5	2	1	2	1	1	1	2	1	5	5	5	5	4	1	5	4	1	1	4	4	2	5	5	5	4	2	4	2	4	2	5	5	5	2	1	5	5	1	1	1	1	1	1	4
100	NL	1	14	8	4	6	1	2	1	1	1	3	1	3	4	4	3	3	3	4	3	1	1	3	3	2	5	4	4	4	3	5	3	3	3	4	4	4	4	4	5	4	2	2	1	3	1	3	4
100	NL	2	14	8	4	3	2	2	1	1	1	5	1	5	5	3	4	4	3	4	2	2	2	2	4	1	5	5	5	4	5	5	2	3	2	5	5	5	4	5	5	5	3	5	1	5	4	2	5
100	NL	2	13	7	4	6	1	2	1	1	1	4	3	5	5	4	5	4	2	4	3	2	3	3	4	2	5	5	5	3	5	4	2	3	4	5	5	5	5	5	5	4	5	5	1	5	3	2	4
100	NL	2	13	3	3	2	2	2	1	1	1	4	2	5	5	5	4	1	1	5	4	3	3	1	2	1	5	5	5	2	3	4	1	2	1	5	5	5	1	3	5	2	3	1	3	5	5	3	5
100	NL	2	14	3	4	3	1	2	1	1	1	5	2	3	5	3	3	3	3	3	3	3	3	3	3	2	4	3	5	3	4	3	2	2	2	4	4	4	5	4	5	4	4	5	1	4	2	2	5
100	NL	1	13	3	3	3	1	2	1	1	1	4	2	3	5	4	3	2	1	4	3	2	1	2	4	1	5	5	5	3	4	4	3	3	2	5	4	5	3	4	5	5	3	4	2	5	4	3	4
100	NL	2	13	11	4	2	1	2	1	1	1	3	1	4	5	4	4	3	1	5	3	2	3	3	4	2	5	5	5	2	4	5	2	3	2	5	4	5	3	3	5	5	2	3	4	5	5	5	5
100	NL	1	16	11	4	1	2	2	1	2	1	5	5	5	5	5	5	3	2	2	2	2	2	4	4	3	5	5	5	4	3	5	4	4	4	5	5	5	4	3	5	4	4	1	1	3	3	2	4
100	NL	1	13	10	4	3	1	2	1	1	1	4	1	4	5	3	3	3	2	4	4	1	3	3	4	1	5	4	5	2	3	5	2	3	1	5	4	5	2	3	5	2	5	1	5	3	3	1	4
100	NL	1	11	2	2	4	2	1	1	1	1	5	1	4	5	5	3	2	1	4	3	1	1	2	4	4	5	5	5	5	4	5	2	4	3	5	5	5	5	4	5	5	4	2	1	5	3	5	4
100	NL	1	13	7	3	6	1	2	1	1	1	4	2	5	5	5	4	4	2	4	2	2	2	4	4	3	4	4	5	2	2	4	4	4	3	4	5	5	2	3	5	4	4	2	4	5	3	4	4
100	NL	2	15	3	5	3	1	2	1	1	1	4	2	3	5	4	3	3	2	5	3	1	3	4	4	3	4	5	5	3	3	3	4	4	3	5	5	5	4	4	5	5	5	5	5	5	5	4	5
100	NL	2	12	10	3	6	2	2	1	1	2	3	2	4	5	3	4	3	2	4	4	2	3	2	3	3	4	5	5	2	4	4	2	3	1	5	4	5	3	5	4	4	3	2	3	4	3	4	4
100	NL	2	15	7	5	2	1	2	1	1	1	4	1	3	5	4	2	2	3	5	5	1	4	2	4	1	4	5	5	2	2	4	2	2	2	4	3	5	1	1	5	4	1	4	1	4	4	1	5
100	NL	1	14	10	4	2	2	2	1	2	1	5	1	4	5	5	3	2	2	5	1	1	1	2	4	3	5	5	5	4	4	5	1	4	2	5	5	5	5	5	5	3	4	1	1	4	3	3	5
100	NL	1	12	10	3	3	1	2	1	2	1	4	3	5	5	5	2	2	2	4	1	1	1	2	3	2	4	4	5	3	2	2	2	2	2	4	3	5	2	2	2	2	2	1	1	5	2	1	4
100	NL	2	14	8	5	3	2	2	1	1	1	5	1	4	5	4	2	2	3	4	3	2	2	1	4	3	4	4	5	1	1	3	1	4	2	4	4	5	1	1	2	1	3	1	1	2	2	2	5
100	NL	3	12	8	3	6	2	2	1	1	1	1	1	1	1	1	1	1	5	4	2	4	3	4	4	4	1	4	4	5	5	5	4	3	3	1	1	1	1	1	5	3	3	3	3	3	3	3	4
100	NL	2	13	10	4	3	2	1	1	1	1	4	1	4	5	4	3	3	2	4	4	2	2	1	4	2	5	5	5	4	4	5	3	3	2	5	5	5	4	4	5	4	3	5	2	5	3	3	5
100	NL	2	12	3	3	3	1	2	1	1	1	4	3	3	5	5	3	2	3	4	5	2	3	3	3	3	4	4	5	2	3	3	2	2	2	4	4	5	3	3	5	4	3	2	1	4	3	3	4
100	NL	2	11	11	4	6	1	1	1	1	1	4	2	4	5	4	3	3	2	4	3	1	2	4	4	3	5	5	5	2	4	5	3	3	2	5	5	5	5	5	5	4	4	3	2	4	4	2	4
100	NL	2	14	3	4	2	1	2	1	1	1	4	2	4	5	3	5	4	1	3	4	1	2	3	3	3	5	4	5	4	3	5	3	3	2	5	4	5	4	2	5	5	3	3	4	5	3	3	4
100	NL	2	13	3	3	2	2	2	1	1	1	5	3	5	5	5	5	4	4	3	4	3	4	4	4	4	3	5	5	4	4	4	3	3	4	5	5	5	4	4	5	5	3	1	4	5	2	3	5
100	NL	2	12	7	3	8	1	2	1	2	1	4	3	4	5	5	3	3	2	4	2	1	1	2	3	2	4	5	5	2	4	4	2	2	3	4	5	5	2	3	3	4	3	3	1	1	2	2	3
100	NL	2	12	8	3	3	1	2	1	1	1	4	2	5	5	5	4	4	3	5	3	1	3	2	4	1	5	5	5	1	3	5	2	4	1	5	5	5	1	3	5	5	3	4	4	3	3	2	5
100	NL	1	13	8	3	6	2	1	1	1	1	4	2	4	5	4	1	1	3	3	3	3	3	3	3	2	5	5	5	5	4	5	3	3	3	5	5	5	4	4	5	4	4	4	3	3	3	3	4
100	NL	2	13	11	3	6	1	2	1	1	1	2	1	5	5	4	5	5	1	3	5	3	2	1	2	1	5	5	5	3	2	5	1	2	1	5	5	5	5	5	5	2	3	3	4	2	1	5	4
100	NL	2	14	7	4	6	1	2	1	1	1	3	1	3	5	2	4	3	2	5	4	2	4	1	4	1	5	5	5	1	1	3	2	2	2	5	5	4	1	1	5	4	4	1	1	4	3	1	4
100	NL	1	12	10	3	6	1	2	1	1	1	3	3	4	5	4	3	3	3	5	4	2	1	1	2	1	5	5	5	5	4	5	1	2	1	5	5	5	5	4	5	4	1	1	4	5	2	3	4
100	NL	1	14	10	5	2	2	2	1	1	1	3	1	2	5	3	2	2	2	4	4	2	3	3	3	2	4	4	4	2	2	4	2	3	2	2	2	4	2	2	4	5	5	4	1	4	2	2	3
100	NL	2	14	8	4	6	1	1	1	1	1	3	1	4	5	2	3	3	1	4	3	3	4	1	3	1	5	5	5	1	5	4	1	2	2	5	5	5	4	5	5	4	2	3	1	2	2	4	5
100	NL	2	12	8	3	3	1	2	1	1	1	5	3	4	5	5	4	4	1	4	3	1	1	3	4	1	5	5	5	3	3	5	3	3	2	5	5	5	2	2	4	4	3	3	3	4	2	3	5
100	NL	2	13	8	3	3	1	2	1	1	1	4	2	5	5	3	4	3	1	4	1	1	3	2	3	2	5	5	5	3	4	5	3	3	2	5	5	5	4	5	5	4	4	3	3	5	3	3	5
100	NL	1	12	3	3	3	1	2	1	1	1	4	1	2	5	5	1	1	1	5	3	3	2	4	3	2	4	4	5	1	3	4	2	3	1	4	4	5	1	3	4	4	2	1	2	3	2	4	4
100	NL	2	12	8	3	6	1	2	1	1	1	5	1	3	5	3	5	3	3	4	3	2	3	4	4	3	5	5	4	1	5	5	2	3	4	5	5	4	1	5	4	4	3	4	3	4	2	3	4
100	NL	2	13	3	3	3	1	2	1	1	1	4	2	4	5	3	3	2	2	4	4	3	3	3	3	2	5	5	5	1	5	4	3	2	2	5	5	5	1	4	3	3	4	4	2	5	3	3	3
100	NL	2	14	3	3	3	2	2	1	1	1	4	3	5	5	2	4	4	3	5	5	2	3	3	4	2	4	5	5	1	5	5	3	3	2	4	4	4	2	4	4	2	5	4	1	4	3	2	3
100	NL	2	13	3	3	2	2	2	1	1	1	4	2	5	5	3	3	2	1	5	3	2	4	3	2	2	4	4	5	3	4	5	2	3	2	4	4	5	3	4	5	3	5	5	1	4	2	2	3
100	NL	1	12	8	3	6	2	2	1	1	1	4	3	3	5	4	2	1	2	5	1	2	2	2	4	2	4	5	5	1	3	5	2	4	1	5	5	5	1	4	5	4	2	3	2	4	1	1	4
100	NL	1	12	8	3	3	2	2	1	1	1	3	1	4	5	5	4	3	2	4	2	1	3	3	4	2	5	5	5	2	4	4	2	3	1	5	5	5	2	4	5	5	1	3	1	5	5	5	4
100	NL	2	14	3	5	3	1	2	1	1	1	4	2	3	5	3	2	2	1	5	3	1	3	1	2	1	5	4	5	1	1	5	1	2	1	5	3	4	1	1	5	5	4	3	3	1	1	1	5
[truncated: 6 more columns]
